# Supplementary material
Source: PubMed Central journal article supplement (PMC6143053)
Supplement: jamaoncol-4-e180163-s001.pdf [file jamaoncol-4-e180163-s001.pdf]

## Supplementary Online Content

Goodman CR, Seagle B-L L, Friedl TWP, et al. Association of circulating tumor cell status with benefit of radiotherapy and survival in early-stage breast cancer. *JAMA Oncol*. Published online May 3, 2018. doi: 10.1001/jamaoncol.2018.0163

**eMethods.** Participants, Materials, Outcomes, and Analysis

**eFigure 1.** CONSORT Diagram of Patient Selection

**eFigure 2.** Unadjusted Survival Curves for the SUCCESS Cohorts

**eTable 1.** Characteristics of the Matched Cohorts of All Patients From the NCDB Cohort Grouped by CTC Status

**eTable 2.** Characteristics of the Matched Cohorts of Patients From the SUCCESS Cohort Grouped by CTC Status

**eTable 3.** Characteristics of the Matched Cohorts of Patients Who Underwent Breast-Conserving Surgery From the Pooled Cohort

**eTable 4.** Characteristics of the Matched Cohorts of Patients Who Underwent Mastectomy From the Pooled Cohort

**eTable 5.** Kaplan-Meier Estimates and Multivariable Survival Models for Overall Survival From the NCDB Cohort

**eTable 6.** Kaplan-Meier Estimates and Multivariable Survival Models for Disease-Free Survival From the SUCCESS Cohort

**eTable 7.** Kaplan-Meier Estimates and Multivariable Survival Models for Local Recurrence-Free Survival From the SUCCESS Cohort

**eTable 8.** Kaplan-Meier Estimates and Multivariable Survival Models for Overall Survival From the SUCCESS Cohort

**eTable 9.** Kaplan-Meier Estimates and Multivariable Survival Models for Overall Survival of Patients Who Underwent Breast-Conserving Surgery From the Pooled Cohort

**eTable 10.** Kaplan-Meier Estimates and Multivariable Survival Models for Overall Survival of Patients Who Underwent Mastectomy From the Pooled Cohort

**eTable 11.** Additional Characteristics of the NCDB Cohort Grouped by CTC Status

**eTable 12.** Adjusted Odds Ratios for Factors Associated With CTC-Positive Status of Patients From the NCDB Cohort

**eTable 13.** Characteristics of the Merged Cohorts Grouped by Receipt of Radiation

**eTable 14.** Characteristics of the Patients Within the Merged Cohorts Who Received Breast-Conserving Surgery or Mastectomy Grouped by Receipt of Radiation

**eTable 15.** Sensitivity Analyses for Possible Unmeasured Confounding

This supplementary material has been provided by the authors to give readers additional information about their work.

## **eMethods. Participants, Materials, Outcomes, and Analysis**

### **National Cancer Database**

Individual-level data is prospectively collected by professional registrars and is audited. The American College of Surgeons has executed a Business Associate Agreement that includes a data use agreement with each Commission on Cancer-accredited hospital.

### **SUCCESS Trial**

The Simultaneous Study of Gemcitabine-Docetaxel Combination adjuvant treatment, as well as Extended Bisphosphonate and Surveillance (SUCCESS) trial was a prospective randomized Phase III trial (EUDRA-CT No. 2005-000490-21).

Eligible patients included women with pT1-T4, pN0-N3, M0 breast cancer considered to be average- or high-risk for whom chemotherapy was recommended. All women had at least one of the following high-risk factors: histopathological proof of axillary lymph node metastases (pN1-3), tumor size  $\geq$ pT2, histological grade 3, negative hormone receptor status, or age  $\leq$ 35 years. Women were randomized to receive adjuvant fluorouracil-epirubicin-cyclophosphamide (FEC; 500/100/500mg/m<sup>2</sup>) followed by three cycles of docetaxel (100mg/m<sup>2</sup>) every 3 weeks or three cycles of FEC followed by 3 cycles of gemcitabine (1000mg/m<sup>2</sup> d1,8)-docetaxel (75mg/m<sup>2</sup>) every 3 weeks.<sup>7</sup> Following the completion of chemotherapy, the patients were further randomized to receive either 2 or 5 years of zoledronate.

Surgery consisted of either breast conserving surgery (BCS) or mastectomy with R0 resection. Sentinel node dissection was performed in all patients without clinical evidence of nodal disease followed by complete axillary node dissection in patients with positive sentinel nodes. Patients with clinical evidence of nodal disease received axillary lymph node dissection. Radiotherapy consisted of treatment of the breast or chest wall using tangential opposition beams to a total dose of 50.4 Gy in 1.8 Gy daily fractions. A boost was given at the discretion of the individual investigator. Irradiation of the axillary lymph nodes was not permitted for patients with three or less positive lymph nodes.

### **Detection of CTCs**

SUCCESS trial: Following resection, but prior to adjuvant therapy, blood was collected for identification of CTCs on 1,994 patients using the CellSearch system®.<sup>19</sup> CTCs were evaluated using the CellSearch System (Veridex, Raritan, NJ) as previously reported.<sup>1</sup> Thirty (30) milliliters of peripheral blood was collected into three CellSave tubes, and 7.5mL of the centrifuged buffy coat was processed. The samples with at least one positive CTC per 30mL of peripheral blood collected was considered CTC-positive.

### **Variable Definition**

Variables were defined as follows: Lymphovascular Invasion (LVI): “Negative,” or “Positive.” Histology: ductal (“IDC”), lobular or mixed (“ILC/Mixed”), or “Other.” Type of surgery: breast conserving surgery (“BCS”), or mastectomy “Mastectomy.” Race: “White” or “Black/Other.” Hispanic ethnicity: “No” or “Yes.” Insurance status: “Private,” “Government,” or “None.” Charlson-Deyo comorbidity score: “0,” “1,” or “2.” Prior cancer: “No” or “Yes.” Facility type: “Academic,” “Community,” “Comprehensive,” or “Integrated.” Income quartile, defined by NCDB based on the median household income within the patient’s zip code: “Top,” “2<sup>nd</sup>,” “3<sup>rd</sup>,” “Bottom.” Education quartile, defined by NCDB based on the number of adults in the patient’s zip code who did not graduate from high school: “Top,” “2<sup>nd</sup>,” “3<sup>rd</sup>,” “Bottom.” Population: “Urban” or “Nonurban.” Menopausal status: “Pre-menopausal” or “Post-menopausal.” A new variable was made combining CTC-status and radiotherapy. All variables were checked for consistency. Missing data was coded as “Unknown.”

### **Definition of Outcomes**

Local Recurrence-Free Survival (LRFS) and Disease-Free Survival (DFS) were defined as per the SUCCESS trial. LRFS was defined as any relapse in the area of surgery between the sternum and anterior axillary line below the inferior clavicular fossa and above the 7<sup>th</sup> rib, including involvement of the pectoral muscles, serratus lateralis muscles, or the oblique externus muscle. DFS was defined as invasive disease recurrence, second primary tumors, and death from any cause.

### **Multivariable Models**

In each multivariable analysis, inclusion of CTC-status as a covariate led to decreased Akaike Information Criterion (AIC) values, indicating that inclusion of CTC improves the model compared to a model in which radiotherapy alone is considered, while inclusion of the interaction variable decreased AIC values yet further.

**eFigure 1. CONSORT Diagram of Patient Selection Within the (A) National Cancer Database (NCDB), 2004 to 2014, and (B) SUCCESS clinical trial.**

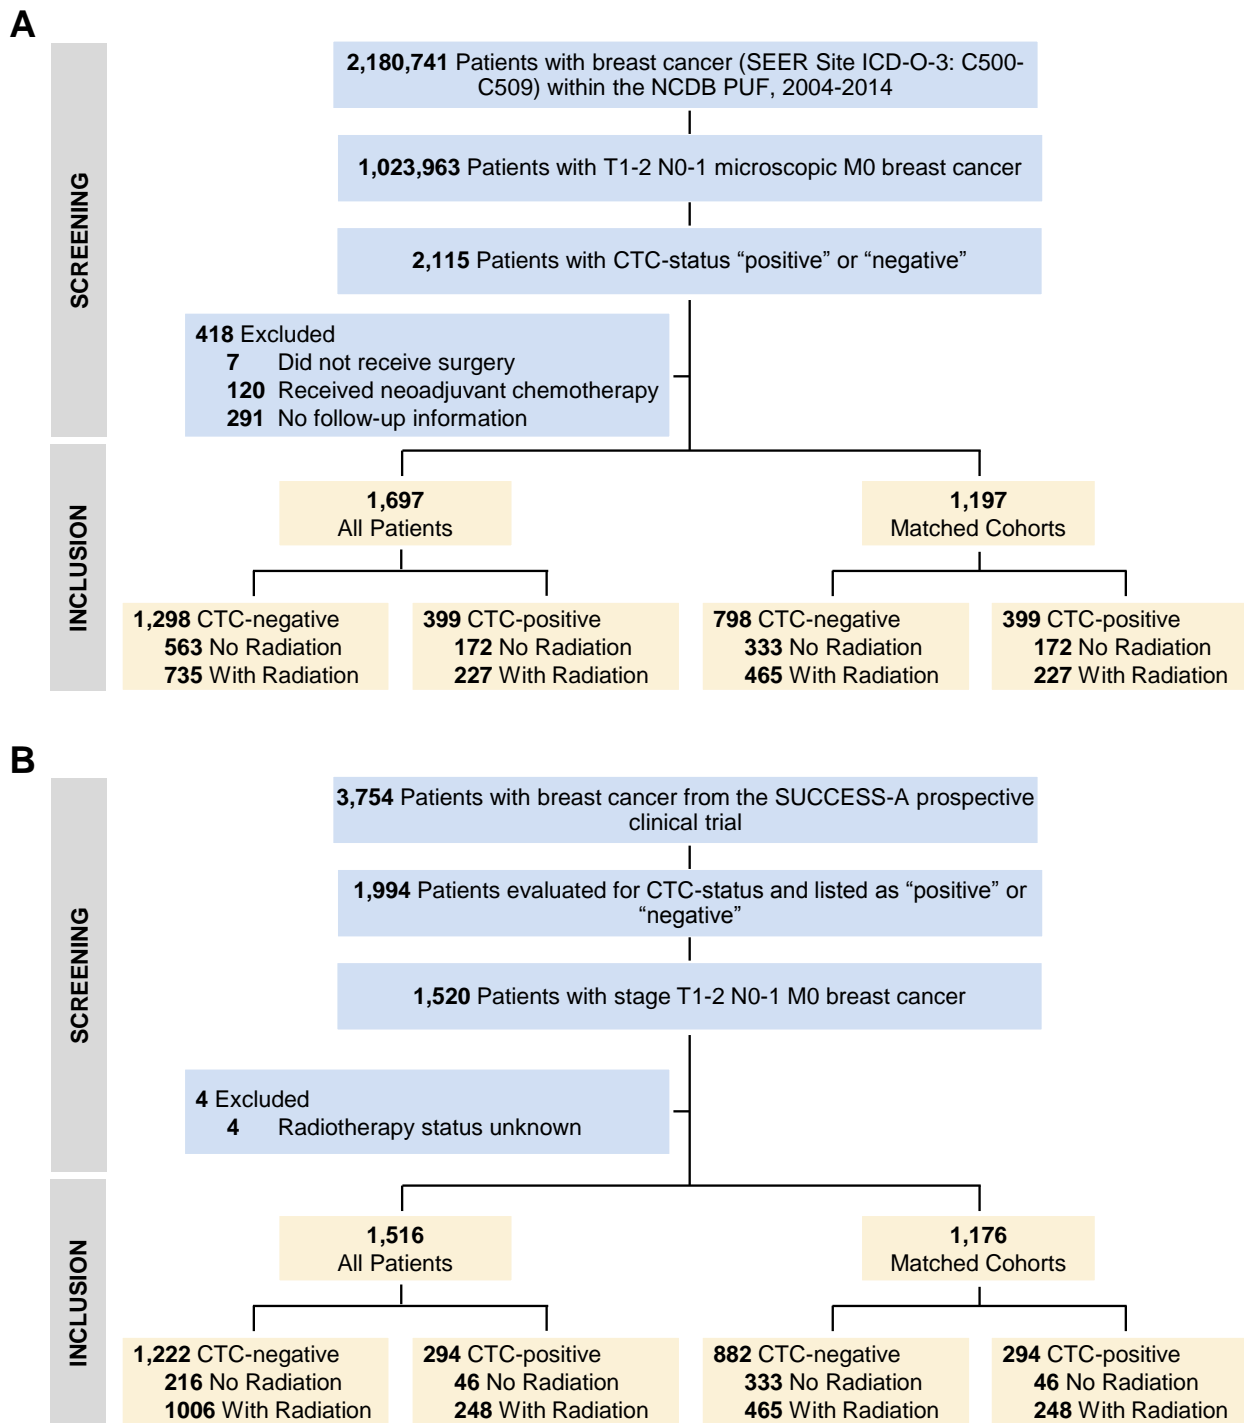

ICD: International Classification of Diseases; PUF: Participant user file; CTC: Circulating tumor cell; RT: Radiotherapy.

**eFigure 2. Unadjusted Survival Curves for the SUCCESS Cohorts**

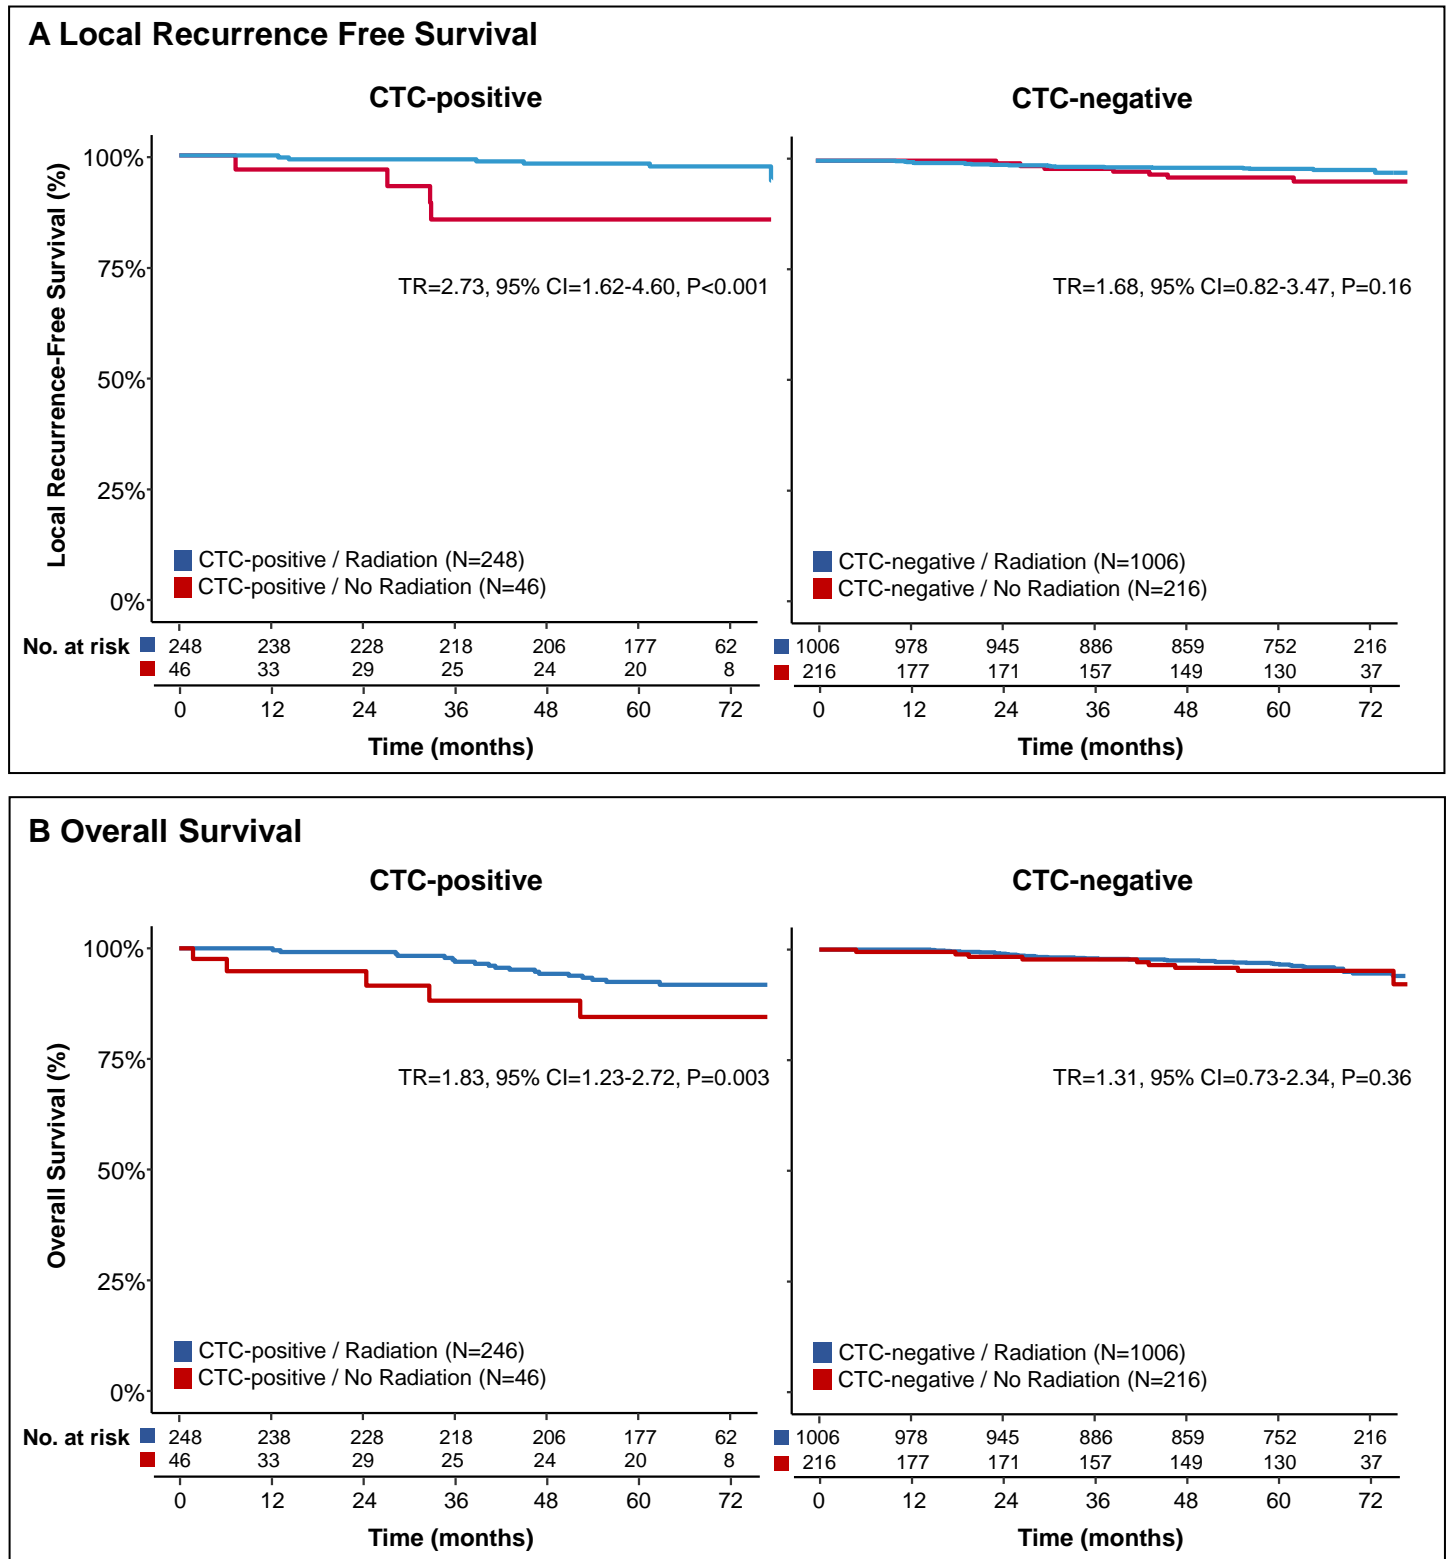

Unadjusted survival curves based on Kaplan-Meier estimates for CTC-positive (left) and CTC-negative (right) patients with primary breast cancer treated with (blue) or without (red) adjuvant radiotherapy from the SUCCESS cohort for (A) local recurrence-free survival and (B) overall survival. TR=Time ratio; 95% CI = 95% Confidence Interval; P: P-value; CTC: Circulating tumor cell.

**eTable 1. Characteristics of the Matched Cohorts of All Patients From the NCDB Cohort Grouped by CTC Status**

| Variable          | CTC-negative<br>(N=798) | CTC-positive<br>(N=399) | P Value | SMD   |
|-------------------|-------------------------|-------------------------|---------|-------|
| Age (years)       | 62.0 [52.0, 70.0]       | 61.0 [52.0, 70.0]       | .63     | 0.03  |
| Follow-up (mo)    | 39.2 [26.6, 52.3]       | 40.4 [28.7, 54.0]       | .15     | 0.09  |
| Tumor stage       |                         |                         |         |       |
| 1                 | 596 (74.7)              | 290 (72.7)              | .49     | 0.05  |
| 2                 | 202 (25.3)              | 109 (27.3)              |         |       |
| Nodal stage       |                         |                         |         |       |
| 0                 | 747 (93.6)              | 366 (91.7)              | .23     | 0.07  |
| 1 (microscopic)   | 51 (6)                  | 33 (8)                  |         |       |
| Grade             |                         |                         |         |       |
| 1                 | 247 (31.0)              | 124 (31.1)              | >.99    | 0.003 |
| 2                 | 356 (44.6)              | 178 (44.6)              |         |       |
| 3                 | 195 (24.4)              | 97 (24)                 |         |       |
| LVI               |                         |                         |         |       |
| Negative          | 582 (72.9)              | 287 (71.9)              | .44     | 0.08  |
| Positive          | 76 (10)                 | 47 (12)                 |         |       |
| Unknown           | 140 (17.5)              | 65 (16)                 |         |       |
| Histology         |                         |                         |         |       |
| IDC               | 621 (77.8)              | 311 (77.9)              | >.99    | 0.003 |
| ILC/Mixed         | 177 (22.2)              | 88 (22)                 |         |       |
| ER status         |                         |                         |         |       |
| Positive          | 728 (91.2)              | 365 (91.5)              | .91     | 0.01  |
| Negative          | 70 (9)                  | 34 (9)                  |         |       |
| PR status         |                         |                         |         |       |
| Positive          | 649 (81.3)              | 324 (81.2)              | >.99    | 0.003 |
| Negative          | 149 (18.7)              | 75 (19)                 |         |       |
| ERBB2 status      |                         |                         |         |       |
| Negative          | 705 (88.3)              | 345 (86.5)              | .35     | 0.06  |
| Positive          | 93 (12)                 | 54 (14)                 |         |       |
| Surgery           |                         |                         |         |       |
| BCS               | 478 (59.9)              | 241 (60.4)              | .90     | 0.01  |
| Mastectomy        | 320 (40.1)              | 158 (39.6)              |         |       |
| Chemotherapy      |                         |                         |         |       |
| No                | 571 (71.6)              | 279 (69.9)              | .59     | 0.04  |
| Yes               | 227 (28.4)              | 120 (30.1)              |         |       |
| Radiotherapy      |                         |                         |         |       |
| No                | 342 (42.9)              | 172 (43.1)              | .95     | 0.01  |
| Yes               | 456 (57.1)              | 227 (56.9)              |         |       |
| Hormone therapy   |                         |                         |         |       |
| No                | 171 (21.4)              | 86 (22)                 | >.99    | 0.003 |
| Yes               | 627 (78.6)              | 313 (78.4)              |         |       |
| Race              |                         |                         |         |       |
| White             | 623 (78.1)              | 316 (79.2)              | .71     | 0.03  |
| Black/Other       | 175 (21.9)              | 83 (21)                 |         |       |
| Hispanic          |                         |                         |         |       |
| No                | 760 (95.2)              | 378 (94.7)              | .78     | 0.02  |
| Yes               | 38 (5)                  | 21 (5.3)                |         |       |
| Insurance status  |                         |                         |         |       |
| Private           | 396 (49.6)              | 195 (48.9)              | .85     | 0.02  |
| Government/None   | 402 (50.4)              | 204 (51.1)              |         |       |
| Comorbidity score |                         |                         |         |       |
| 0                 | 696 (87.2)              | 346 (86.7)              | .89     | 0.03  |
| 1                 | 86 (11)                 | 46 (12)                 |         |       |
| 2                 | 16 (2)                  | 7 (2)                   |         |       |

| Variable           | CTC-negative<br>(N=798) | CTC-positive<br>(N=399) | P Value | SMD  |
|--------------------|-------------------------|-------------------------|---------|------|
| Prior cancer       |                         |                         |         |      |
| No                 | 635 (79.6)              | 310 (77.7)              | .45     | 0.05 |
| Yes                | 163 (20.4)              | 89 (22.3)               |         |      |
| Facility type      |                         |                         |         |      |
| Academic           | 275 (34.5)              | 133 (33.3)              | .95     | 0.04 |
| Community          | 96 (12)                 | 52 (13)                 |         |      |
| Comprehensive      | 361 (45.2)              | 182 (45.6)              |         |      |
| Integrated         | 66 (8)                  | 32 (8)                  |         |      |
| Income quartile    |                         |                         |         |      |
| Top                | 288 (36.1)              | 138 (34.6)              | .96     | 0.03 |
| 2nd                | 197 (24.7)              | 102 (25.6)              |         |      |
| 3rd                | 183 (22.9)              | 92 (23)                 |         |      |
| Bottom             | 130 (16.3)              | 67 (17)                 |         |      |
| Education quartile |                         |                         |         |      |
| Top                | 218 (27.3)              | 108 (27.1)              | .99     | 0.02 |
| 2nd                | 244 (30.6)              | 123 (30.8)              |         |      |
| 3rd                | 221 (27.7)              | 108 (27.1)              |         |      |
| Bottom             | 115 (14.4)              | 60 (15)                 |         |      |
| Region             |                         |                         |         |      |
| Nonurban           | 74 (9)                  | 39 (10)                 | .83     | 0.02 |
| Urban              | 724 (90.7)              | 360 (90.2)              |         |      |

Data are presented as count (percentage) or median (interquartile range) with significance determined by Fisher's exact test or Kruskal-Wallis test. P: P-value; SMD: Standardized Mean Difference; CTC: Circulating tumor cell; Follow-up (mo): Follow-up (months); LVI: Lymphovascular Invasion; IDC: Invasive ductal carcinoma; ILC: Invasive lobular carcinoma, ER: Estrogen Receptor; PR: Progesterone Receptor; *ERBB2*: Human epidermal receptor growth factor 2; BCS: Breast-conserving surgery.

**eTable 2. Characteristics of the Matched Cohorts of Patients From the SUCCESS Cohort Grouped by CTC Status**

| Variable            | CTC-negative<br>(N=882) | CTC-positive<br>(N=294) | P<br>Value | SMD    |
|---------------------|-------------------------|-------------------------|------------|--------|
| Age (years)         | 53.0 [46.0, 61.0]       | 54.0 [45.0, 61.0]       | .81        | <0.001 |
| Follow-up (mo)      | 64.4 [60.0-69.9]        | 64.2 [59.6-72.1]        | .85        | 0.03   |
| Grade               |                         |                         |            |        |
| 1                   | 34 (4)                  | 11 (4)                  | >.99       | 0.006  |
| 2                   | 414 (46.9)              | 138 (46.9)              |            |        |
| 3                   | 434 (49.2)              | 145 (49.3)              |            |        |
| Tumor stage         |                         |                         |            |        |
| 1                   | 390 (44.2)              | 128 (43.5)              | .89        | 0.01   |
| 2                   | 492 (55.8)              | 166 (56.5)              |            |        |
| Nodal stage         |                         |                         |            |        |
| 0                   | 380 (43.1)              | 127 (43.2)              | >.99       | 0.002  |
| 1*                  | 502 (56.9)              | 167 (56.8)              |            |        |
| Histology           |                         |                         |            |        |
| IDC                 | 730 (82.8)              | 242 (82.3)              | .91        | 0.03   |
| ILC                 | 89 (10)                 | 29 (10)                 |            |        |
| Other               | 63 (7)                  | 23 (8)                  |            |        |
| ER status           |                         |                         |            |        |
| Positive            | 616 (69.8)              | 205 (69.7)              | >.99       | 0.002  |
| Negative            | 266 (30.2)              | 89 (30)                 |            |        |
| PR status           |                         |                         |            |        |
| Positive            | 580 (65.8)              | 195 (66.3)              | .89        | 0.01   |
| Negative            | 302 (34.2)              | 99 (34)                 |            |        |
| <i>ERBB2</i> status |                         |                         |            |        |
| Negative            | 648 (73.5)              | 219 (74.5)              | .88        | 0.02   |
| Positive            | 216 (25)                | 70 (24)                 |            |        |
| Menopausal status   |                         |                         |            |        |
| Pre-menopausal      | 379 (43.0)              | 124 (42.2)              | .84        | 0.02   |
| Post-menopausal     | 503 (57.0)              | 170 (57.8)              |            |        |
| Chemotherapy        |                         |                         |            |        |
| FEC-Doc             | 415 (47.1)              | 141 (48.0)              | .79        | 0.02   |
| FEC-DocG            | 467 (52.9)              | 153 (52.0)              |            |        |
| Radiotherapy        |                         |                         |            |        |
| Yes                 | 739 (83.8)              | 248 (84.4)              | .86        | 0.02   |
| No                  | 143 (16.2)              | 46 (16)                 |            |        |
| Hormone therapy     |                         |                         |            |        |
| Yes                 | 638 (72.3)              | 210 (71.4)              | .76        | 0.02   |
| No                  | 244 (27.7)              | 84 (29)                 |            |        |
| Surgery             |                         |                         |            |        |
| BCS                 | 657 (74.5)              | 219 (74.5)              | >.99       | <0.001 |
| Mastectomy          | 225 (25.5)              | 75 (26)                 |            |        |
| Trastuzumab         |                         |                         |            |        |
| No                  | 694 (78.7)              | 234 (79.6)              | .80        | 0.02   |
| Yes                 | 188 (21.3)              | 60 (20)                 |            |        |

Data are presented as count (percentage) or median (interquartile range) with significance determined by Fisher's exact test or Kruskal-Wallis test. P: P-value; SMD: Standardized Mean Difference; CTC: Circulating tumor cell; Follow-up (mo): Follow-up (months); IDC: Invasive ductal carcinoma; ILC: Invasive lobular carcinoma, ER: Estrogen Receptor; PR: Progesterone Receptor; *ERBB2*: Human epidermal receptor growth factor 2; FEC-Doc: fluorouracil-epirubicin-cyclophosphamide followed by docetaxel; FEC-DocG: fluorouracil-epirubicin-cyclophosphamide followed by gemcitabine-docetaxel. \*includes N1mi (microscopic) and N1.

**eTable 3. Characteristics of the Matched Cohorts of Patients Who Underwent Breast-Conserving Surgery From the Pooled Cohort**

| Variable            | CTC-negative (N=1380) | CTC-positive (N=460) | P Value | SMD    |
|---------------------|-----------------------|----------------------|---------|--------|
| Age (years)         | 58.0 [49.0, 67.0]     | 58.0 [50.0, 66.0]    | .97     | <0.001 |
| Follow-up (mo)      | 58.5 [34.4, 65.0]     | 56.6 [33.7, 64.9]    | .76     | 0.02   |
| Grade               |                       |                      |         |        |
| 1                   | 225 (16.3)            | 75 (16)              | >.99    | 0.005  |
| 2                   | 654 (47.4)            | 219 (47.6)           |         |        |
| 3                   | 501 (36.3)            | 166 (36.1)           |         |        |
| Tumor stage         |                       |                      |         |        |
| 1                   | 858 (62.2)            | 292 (63.5)           | .66     | 0.03   |
| 2                   | 522 (37.8)            | 168 (36.5)           |         |        |
| Nodal stage         |                       |                      |         |        |
| 0                   | 973 (70.5)            | 322 (70.0)           | .88     | 0.01   |
| 1*                  | 407 (29.5)            | 138 (30.0)           |         |        |
| Histology           |                       |                      |         |        |
| IDC                 | 1115 (80.8)           | 367 (79.8)           | .63     | 0.03   |
| ILC/Mixed           | 265 (19.2)            | 93 (20)              |         |        |
| ER status           |                       |                      |         |        |
| Positive            | 1074 (77.8)           | 364 (79.1)           | .60     | 0.03   |
| Negative            | 306 (22.2)            | 96 (21)              |         |        |
| PR status           |                       |                      |         |        |
| Positive            | 1000 (72.5)           | 339 (73.7)           | .63     | 0.03   |
| Negative            | 380 (27.5)            | 121 (26.3)           |         |        |
| <i>ERBB2</i> status |                       |                      |         |        |
| Negative            | 1160 (84.1)           | 387 (84.1)           | >.99    | 0.002  |
| Positive            | 220 (15.9)            | 73 (16)              |         |        |
| Chemotherapy        |                       |                      |         |        |
| No                  | 492 (35.7)            | 168 (36.5)           | .74     | 0.02   |
| Yes                 | 888 (64.3)            | 292 (63.5)           |         |        |
| Radiotherapy        |                       |                      |         |        |
| Yes                 | 1233 (89.3)           | 411 (89.3)           | >.99    | <0.001 |
| No                  | 147 (10.7)            | 49 (11)              |         |        |
| Hormone therapy     |                       |                      |         |        |
| Yes                 | 1036 (75.1)           | 338 (73.5)           | .50     | 0.04   |
| No                  | 344 (24.9)            | 122 (26.5)           |         |        |

Data are presented as count (percentage) or median (interquartile range) with significance determined by Fisher's exact test or Kruskal-Wallis test. P: P-value; SMD: Standardized Mean Difference; CTC: Circulating tumor cell; Follow-up (mo): Follow-up (months); IDC: Invasive ductal carcinoma; ILC: Invasive lobular carcinoma, ER: Estrogen Receptor; PR: Progesterone Receptor; *ERBB2*: Human epidermal receptor growth factor 2. \*includes N1mi (microscopic) and N1.



**eTable 4. Characteristics of the Matched Cohorts of Patients Who Underwent Mastectomy From the Pooled Cohort**

| Variable            | CTC-negative<br>(N=699) | CTC-positive<br>(N=233) | P Value | SMD  |
|---------------------|-------------------------|-------------------------|---------|------|
| Age (years)         | 57.0 [49.0, 66.0]       | 56.0 [48.0, 65.0]       | .30     | 0.09 |
| Follow-up (mo)      | 39.2 [26.8-52.7]        | 41.8 [28.5-56.5]        | .09     | 0.12 |
| Grade               |                         |                         |         |      |
| 1                   | 127 (18.2)              | 44 (19)                 | .87     | 0.04 |
| 2                   | 349 (49.9)              | 119 (51.1)              |         |      |
| 3                   | 223 (31.9)              | 70 (30)                 |         |      |
| Tumor stage         |                         |                         |         |      |
| 1                   | 392 (56.1)              | 126 (54.1)              | .60     | 0.04 |
| 2                   | 307 (43.9)              | 107 (45.9)              |         |      |
| Nodal stage         |                         |                         |         |      |
| 0                   | 505 (72.2)              | 171 (73.4)              | .80     | 0.03 |
| 1*                  | 194 (27.8)              | 62 (27)                 |         |      |
| Histology           |                         |                         |         |      |
| IDC                 | 551 (78.8)              | 177 (76.0)              | .36     | 0.07 |
| ILC/Mixed           | 148 (21.2)              | 56 (24)                 |         |      |
| ER status           |                         |                         |         |      |
| Positive            | 597 (85.4)              | 205 (88.0)              | .38     | 0.08 |
| Negative            | 102 (14.6)              | 28 (12)                 |         |      |
| PR status           |                         |                         |         |      |
| Positive            | 533 (76.3)              | 179 (76.8)              | .93     | 0.01 |
| Negative            | 166 (23.7)              | 54 (23)                 |         |      |
| <i>ERBB2</i> status |                         |                         |         |      |
| Negative            | 583 (83.4)              | 182 (78.1)              | .08     | 0.14 |
| Positive            | 116 (16.6)              | 51 (22)                 |         |      |
| Chemotherapy        |                         |                         |         |      |
| No                  | 319 (45.6)              | 111 (47.6)              | .60     | 0.04 |
| Yes                 | 380 (54.4)              | 122 (52.4)              |         |      |
| Radiotherapy        |                         |                         |         |      |
| Yes                 | 176 (25.2)              | 64 (28)                 | .49     | 0.05 |
| No                  | 523 (74.8)              | 169 (72.5)              |         |      |
| Hormone therapy     |                         |                         |         |      |
| Yes                 | 529 (75.7)              | 186 (79.8)              | .21     | 0.10 |
| No                  | 170 (24.3)              | 47 (20)                 |         |      |

Data are presented as count (percentage) or median (interquartile range) with significance determined by Fisher's exact test or Kruskal-Wallis test. P: P-value; SMD: Standardized Mean Difference; CTC: Circulating tumor cell; Follow-up (mo): Follow-up (months); IDC: Invasive ductal carcinoma; ILC: Invasive lobular carcinoma, ER: Estrogen Receptor; PR: Progesterone Receptor; *ERBB2*: Human epidermal receptor growth factor 2. \*includes N1mi (microscopic) and N1.

**eTable 5. Kaplan-Meier Estimates and Multivariable Survival Models for Overall Survival From the NCDB Cohort**

| Variable                                | Kaplan Meier Estimates        |                                  |                           |            | Accelerated Failure Time Multivariable Analysis        |            |                  |                 |
|-----------------------------------------|-------------------------------|----------------------------------|---------------------------|------------|--------------------------------------------------------|------------|------------------|-----------------|
|                                         | All patients                  |                                  |                           |            | All patients                                           |            | Matched Cohorts  |                 |
|                                         | N (events)                    | Restricted Mean OS (mo) (95% CI) | Four-year OS (%) (95% CI) | Log-Rank P | TR (95% CI)                                            | P Value    | TR (95% CI)      | P Value         |
| N (events)                              |                               |                                  |                           |            | 1,697 (92)                                             |            | 1,197 (57)       |                 |
| Age (per year)                          |                               |                                  |                           |            | 0.97 (0.95-0.98)                                       | <.001      | 0.97 (0.96-0.98) | <.001           |
| CTC status and RT                       |                               |                                  |                           |            |                                                        |            |                  |                 |
| <b>CTC x RT Interaction Coefficient</b> |                               |                                  |                           |            |                                                        | <b>.01</b> |                  | <b>&lt;.001</b> |
| CTC+ RT-                                | 172 (18)                      | 78.6 (74.2-83.0)                 | 88.0 (82.3-94.2)          | .005       | 1 [Reference]                                          | .006       | 1 [Reference]    | <.001           |
| CTC+ RT+                                | 227 (7)                       | 85.5 (83.3-87.6)                 | 94.9 (90.8-99.1)          |            | 2.34 (1.26-4.35)                                       |            | 1.66 (1.26-2.17) |                 |
| CTC- RT-                                | 563 (34)                      | 82.3 (80.1-84.4)                 | 93.4 (91.1-95.9)          |            | 1.93 (1.13-3.30)                                       |            | 1.90 (1.46-2.48) |                 |
| CTC- RT+                                | 735 (33)                      | 82.9 (79.5-86.3)                 | 93.9 (91.7-96.1)          |            | 1.72 (1.07-2.74)                                       |            | 1.59 (1.23-2.07) |                 |
| Grade                                   |                               |                                  |                           |            |                                                        |            |                  |                 |
| 1                                       | 467 (24)                      | 97.2 (94.5-100.0)                | 94.0 (91.3-96.8)          | .48        | 1 [Reference]                                          |            | 1 [Reference]    |                 |
| 2                                       | 770 (38)                      | 95.8 (90.8-100.9)                | 93.3 (91.1-95.6)          |            | 1.19 (0.84-1.68)                                       |            | 1.09 (0.87-1.37) |                 |
| 3                                       | 460 (30)                      | 95.8 (92.9-98.8)                 | 92.1 (89.0-95.3)          |            | 0.85 (0.56-1.31)                                       |            | 0.71 (0.54-0.94) |                 |
| LVI                                     |                               |                                  |                           |            |                                                        |            |                  |                 |
| Negative                                | 1275 (68)                     | 67.6 (66.8-68.5)                 | 92.9 (91.1-94.8)          | .94        | 1 [Reference]                                          |            | 1 [Reference]    |                 |
| Positive                                | 142 (8)                       | 67.8 (65.5-70.0)                 | 92.4 (87.3-97.8)          |            | 0.83 (0.51-1.37)                                       |            | 0.87 (0.62-1.21) |                 |
| Unknown                                 | 280 (16)                      | 67.9 (66.3-69.4)                 | 94.9 (91.1-97.8)          |            | 0.95 (0.65-1.38)                                       |            | 0.79 (0.63-0.99) |                 |
| Histology                               |                               |                                  |                           |            |                                                        |            |                  |                 |
| IDC                                     | 1389 (73)                     | 100.3 (97.0-103.6)               | 93.5 (91.9-95.1)          | .59        | 1 [Reference]                                          |            | 1 [Reference]    |                 |
| ILC/mixed                               | 308 (19)                      | 99.6 (95.5-103.8)                | 91.8 (87.8-96.0)          |            | 0.94 (0.65-1.35)                                       |            | 0.81 (0.65-1.01) |                 |
| Tumor stage                             |                               |                                  |                           |            |                                                        |            |                  |                 |
| 1                                       | 1292 (61)                     | 100.5 (96.5-104.5)               | 93.7 (92.0-95.5)          | .04        | 1 [Reference]                                          |            | 1 [Reference]    |                 |
| 2                                       | 405 (31)                      | 98.3 (94.8-101.9)                | 91.5 (88.2-94.8)          |            | 0.72 (0.51-1.00)                                       |            | 0.85 (0.69-1.05) |                 |
| Nodal stage                             |                               |                                  |                           |            |                                                        |            |                  |                 |
| 0                                       | 1610 (88)                     | 84.5 (82.8-86.2)                 | 93.1 (91.5-94.7)          | .73        | 1 [Reference]                                          |            | 1 [Reference]    |                 |
| 1 (microscopic)                         | 87 (4)                        | 86.5 (82.7-90.3)                 | 94.1 (88.4-100.0)         |            | 0.80 (0.43-1.51)                                       |            | 0.75 (0.48-1.16) |                 |
| ER status                               |                               |                                  |                           |            |                                                        |            |                  |                 |
| Positive                                | 1445 (77)                     | 100.1 (97.0-103.2)               | 93.4 (91.8-95.1)          | .51        | 1 [Reference]                                          |            | 1 [Reference]    |                 |
| Negative                                | 252 (15)                      | 101.0 (97.3-104.7)               | 91.5 (87.1-96.1)          |            | 1.21 (0.65-2.24)                                       |            | 1.49 (0.99-2.25) |                 |
| PR status                               |                               |                                  |                           |            |                                                        |            |                  |                 |
| Positive                                | 1274 (67)                     | 101.3 (99.6-103.1)               | 93.3 (91.6-95.1)          | .62        | 1 [Reference]                                          |            | 1 [Reference]    |                 |
| Negative                                | 423 (25)                      | 96.5 (86.7-106.2)                | 92.6 (89.6-95.8)          |            | 1.30 (0.83-2.05)                                       |            | 1.17 (0.87-1.59) |                 |
| ERBB2 status                            |                               |                                  |                           |            |                                                        |            |                  |                 |
| Negative                                | 1530 (78)                     | 86.6 (84.5-88.7)                 | 93.4 (91.9-95.1)          | .33        | 1 [Reference]                                          |            | 1 [Reference]    |                 |
| Positive                                | 167 (12)                      | 86.0 (82.2-89.8)                 | 90.6 (85.3-96.3)          |            | 0.82 (0.51-1.30)                                       |            | 0.68 (0.48-0.96) |                 |
| <b>Variable</b>                         | <b>Kaplan Meier Estimates</b> |                                  |                           |            | <b>Accelerated Failure Time Multivariable Analysis</b> |            |                  |                 |

|                   | All Patients |                                  |                           |            | All patients     |         | Matched Cohorts  |         |
|-------------------|--------------|----------------------------------|---------------------------|------------|------------------|---------|------------------|---------|
|                   | N (events)   | Restricted Mean OS (mo) (95% CI) | Four-year OS (%) (95% CI) | Log-Rank P | TR (95% CI)      | P Value | TR (95% CI)      | P Value |
| Hormone therapy   |              |                                  |                           |            |                  |         |                  |         |
| No                | 458 (40)     | 96.7 (93.0-100.4)                | 88.4 (84.7-92.2)          | <.001      | 1 [Reference]    | .006    | 1 [Reference]    | .003    |
| Yes               | 1239 (52)    | 101.4 (98.1-104.8)               | 94.9 (93.3-96.5)          |            | 1.67 (1.16-2.40) |         | 1.41 (1.12-1.77) |         |
| Chemotherapy      |              |                                  |                           |            |                  |         |                  |         |
| No                | 1181 (71)    | 100.4 (98.4-102.3)               | 92.5 (90.6-94.5)          | .09        | 1 [Reference]    | .81     | 1 [Reference]    | .26     |
| Yes               | 516 (21)     | 101.1 (95.7-106.6)               | 94.6 (92.1-97.1)          |            | 1.05 (0.72-1.53) |         | 1.15 (0.90-1.47) |         |
| Race              |              |                                  |                           |            |                  |         |                  |         |
| White             | 1314 (69)    | 85.8 (83.7-87.8)                 | 93.4 (91.7-95.2)          | .50        | 1 [Reference]    | .09     | 1 [Reference]    | .39     |
| Black/Other       | 383 (23)     | 86.6 (84.3-88.8)                 | 92.6 (89.5-95.7)          |            | 0.74 (0.53-1.04) |         | 1.12 (0.87-1.43) |         |
| Insurance Status  |              |                                  |                           |            |                  |         |                  |         |
| Private           | 863 (22)     | 102.8 (98.7-107.0)               | 97.1 (95.6-98.6)          | <.001      | 1 [Reference]    | .02     | 1 [Reference]    | .01     |
| Government/None   | 834 (70)     | 97.8 (95.3-100.3)                | 89.1 (86.5-91.8)          |            | 0.61 (0.41-0.92) |         | 0.67 (0.49-0.92) |         |
| Comorbidity Score |              |                                  |                           |            |                  |         |                  |         |
| 0                 | 1401 (61)    | 68.4 (67.7-69.1)                 | 94.6 (93.1-96.2)          | <.001      | 1 [Reference]    | .23     | 1 [Reference]    | .43     |
| 1                 | 246 (19)     | 66.3 (64.2-68.4)                 | 88.5 (83.4-93.9)          |            | 0.79 (0.55-1.15) |         | 0.90 (0.70-1.17) |         |
| 2                 | 50 (12)      | 52.7 (44.9-60.5)                 | 73.6 (59.7-90.8)          |            | 0.24 (0.10-0.57) |         | 0.72 (0.51-1.03) |         |
| Prior Cancer      |              |                                  |                           |            |                  |         |                  |         |
| No                | 1313 (59)    | 102.8 (101.3-104.3)              | 94.2 (92.7-95.8)          | <.001      | 1 [Reference]    | .009    | 1 [Reference]    | .46     |
| Yes               | 384 (33)     | 93.1 (86.2-99.9)                 | 89.4 (85.3-93.7)          |            | 0.62 (0.43-0.88) |         | 0.93 (0.77-1.13) |         |

Significance determined by Log-Rank test or Wald test. OS: Overall survival; mo: months; HR (95% CI): Hazard ratio (95% confidence interval); P: P-value; N: Number of patients; CTC: Circulating tumor cell; RT: Radiotherapy; LVI: Lymphovascular Invasion; ER: Estrogen Receptor; PR: Progesterone Receptor; *ERBB2*: Human epidermal receptor growth factor 2.

**eTable 6. Kaplan-Meier Estimates and Multivariable Survival Models for Disease-Free Survival From the SUCCESS Cohort**

| Variable †                              | Kaplan Meier Estimates |                                   |                            |            | Accelerated Failure Time Multivariable Analysis |            |                  |            |
|-----------------------------------------|------------------------|-----------------------------------|----------------------------|------------|-------------------------------------------------|------------|------------------|------------|
|                                         | All patients           |                                   |                            |            | All patients                                    |            | Matched Cohorts  |            |
|                                         | N (events)             | Restricted Mean DFS (mo) (95% CI) | Five-year DFS (%) (95% CI) | Log-Rank P | TR (95% CI)                                     | P Value    | TR (95% CI)      | P Value    |
| N (events)                              |                        |                                   |                            |            | 1,516 (153)                                     |            | 1,176 (118)      |            |
| Age (per year)                          |                        |                                   |                            |            | 1.01 (0.99-1.03)                                | .36        | 1.00 (0.98-1.01) | .85        |
| CTC status and RT                       |                        |                                   |                            |            |                                                 |            |                  |            |
| <b>CTC x RT Interaction Coefficient</b> |                        |                                   |                            |            |                                                 | <b>.04</b> |                  | <b>.04</b> |
| CTC+ RT-                                | 46 (8)                 | 73.7 (62.9-84.4)                  | 75.2 (61.5-91.9)           |            | 1 [Reference]                                   |            | 1 [Reference]    |            |
| CTC+ RT+                                | 248 (35)               | 81.1 (78.0-84.2)                  | 88.0 (83.9-92.4)           | .002       | 3.77 (1.77-8.03)                                | <.001      | 2.83 (2.02-3.98) | <.001      |
| CTC- RT-                                | 216 (23)               | 82.0 (78.4-85.7)                  | 88.3 (83.5-93.4)           |            | 3.28 (1.51-7.12)                                | .002       | 2.16 (1.41-3.33) | <.001      |
| CTC- RT+                                | 1006 (87)              | 84.9 (83.6-86.3)                  | 92.3 (90.5-94.0)           |            | 5.05 (2.47-10.33)                               | <.001      | 3.61 (2.58-5.03) | <.001      |
| Grade                                   |                        |                                   |                            |            |                                                 |            |                  |            |
| 1                                       | 77 (4)                 | 87.3 (83.1-91.5)                  | 96.9 (92.8-100.0)          |            | 1 [Reference]                                   |            | 1 [Reference]    |            |
| 2                                       | 686 (45)               | 86.1 (84.5-87.7)                  | 95.2 (93.4-96.9)           | <.001      | 0.81 (0.42-1.57)                                | .54        | 1.21 (0.70-2.08) | .50        |
| 3                                       | 753 (104)              | 81.0 (79.0-83.0)                  | 85.9 (83.3-88.6)           |            | 0.37 (0.19-0.72)                                | .004       | 0.58 (0.34-1.00) | .05        |
| Tumor stage                             |                        |                                   |                            |            |                                                 |            |                  |            |
| 1                                       | 709 (59)               | 85.1 (83.3-86.9)                  | 93.1 (91.2-95.1)           | .02        | 1 [Reference]                                   |            | 1 [Reference]    |            |
| 2                                       | 807 (94)               | 83.0 (81.2-84.8)                  | 88.5 (86.1-90.9)           |            | 0.67 (0.53-0.86)                                | .002       | 0.91 (0.74-1.13) | .40        |
| Nodal stage                             |                        |                                   |                            |            |                                                 |            |                  |            |
| 0                                       | 638 (56)               | 85.0 (83.1-86.9)                  | 91.4 (89.1-93.8)           | .21        | 1 [Reference]                                   |            | 1 [Reference]    |            |
| 1*                                      | 878 (97)               | 83.1 (81.4-84.8)                  | 90.1 (88.0-92.2)           |            | 0.58 (0.44-0.77)                                | <.001      | 0.50 (0.40-0.62) | <.001      |
| Histology                               |                        |                                   |                            |            |                                                 |            |                  |            |
| IDC                                     | 1265 (133)             | 83.4 (82.0-84.7)                  | 90.3 (88.6-92.1)           |            | 1 [Reference]                                   |            | 1 [Reference]    |            |
| ILC                                     | 140 (11)               | 84.7 (79.8-89.6)                  | 92.4 (87.8-97.3)           | .58        | 1.07 (0.68-1.68)                                | .77        | 1.13 (0.83-1.54) | .44        |
| Other                                   | 111 (9)                | 85.4 (81.6-89.2)                  | 92.0 (86.8-97.5)           |            | 1.08 (0.68-1.76)                                | .73        | 1.50 (1.02-2.21) | .04        |
| ER status                               |                        |                                   |                            |            |                                                 |            |                  |            |
| Positive                                | 1018 (80)              | 85.7 (84.3-87.1)                  | 92.8 (91.1-94.5)           | <.001      | 1 [Reference]                                   |            | 1 [Reference]    |            |
| Negative                                | 502 (73)               | 79.8 (77.4-82.2)                  | 86.5 (83.3-89.7)           |            | 0.59 (0.37-0.94)                                | .03        | 0.60 (0.40-0.89) | .01        |
| PR status                               |                        |                                   |                            |            |                                                 |            |                  |            |
| Positive                                | 963 (80)               | 85.4 (83.8-87.0)                  | 92.2 (90.4-94.1)           | .003       | 1 [Reference]                                   |            | 1 [Reference]    |            |
| Negative                                | 553 (73)               | 81.3 (79.0-83.6)                  | 88.0 (85.2-90.9)           |            | 1.01 (0.68-1.50)                                | .97        | 1.57 (1.13-2.18) | .007       |
| ERBB2                                   |                        |                                   |                            |            |                                                 |            |                  |            |
| Negative                                | 1151 (124)             | 83.2 (81.7-84.6)                  | 90.0 (88.2-91.9)           | .18        | 1 [Reference]                                   |            | 1 [Reference]    |            |
| Positive                                | 365 (29)               | 85.4 (83.2-87.7)                  | 92.7 (89.9-95.6)           |            | 1.57 (1.16-2.13)                                | .004       | 1.43 (1.16-1.77) | <.001      |
| Hormone therapy                         |                        |                                   |                            |            |                                                 |            |                  |            |
| No                                      | 438 (59)               | 79.5 (76.8-82.3)                  | 86.1 (82.6-89.8)           | <.001      | 1 [Reference]                                   |            | 1 [Reference]    |            |
| Yes                                     | 1078 (94)              | 85.3 (83.9-86.6)                  | 92.4 (90.7-94.1)           |            | 1.16 (0.78-1.74)                                | .46        | 1.78 (1.28-2.48) | <.001      |

| Variable †        | Kaplan Meier Estimates |                                   |                            |            | Accelerated Failure Time Multivariable Analysis |         |                  |         |
|-------------------|------------------------|-----------------------------------|----------------------------|------------|-------------------------------------------------|---------|------------------|---------|
|                   | All patients           |                                   |                            |            | All patients                                    |         | Matched Cohorts  |         |
|                   | N (events)             | Restricted Mean DFS (mo) (95% CI) | Five-year DFS (%) (95% CI) | Log-Rank P | TR (95% CI)                                     | P Value | TR (95% CI)      | P Value |
| Menopausal Status |                        |                                   |                            |            |                                                 |         |                  |         |
| Pre-menopausal    | 676 (61)               | 85.1 (83.3-86.9)                  | 92.0 (89.9-94.2)           | 0.21       | 1 [Reference]                                   |         | 1 [Reference]    |         |
| Post-menopausal   | 840 (92)               | 83.0 (81.3-84.8)                  | 89.5 (87.3-91.8)           |            | 0.79 (0.53-1.17)                                | .25     | 1.13 (0.84-1.53) | .42     |

Significance determined by Log-Rank test or Wald test. DFS (mo): Disease-free survival (months); TR (95% CI): Time ratio (95% confidence interval); P: P-value; CTC: Circulating tumor cell. RT: Radiotherapy; ER: Estrogen Receptor; PR: Progesterone Receptor; *ERBB2*: Human epidermal receptor growth factor 2. \*includes N1mi (microscopic) and N1. †Association of CTC-status and radiotherapy have been adjusted for type of chemotherapy regimen, but survival estimates associated with chemotherapy have not been listed as the primary trial outcomes of the SUCCESS trial have yet to be published.

**eTable 7. Kaplan-Meier Estimates and Multivariable Survival Models for Local Recurrence-Free Survival From the SUCCESS Cohort**

| Variable †                              | Kaplan Meier Estimates |                                    |                             |            | Accelerated Failure Time Multivariable Analysis |            |                   |            |
|-----------------------------------------|------------------------|------------------------------------|-----------------------------|------------|-------------------------------------------------|------------|-------------------|------------|
|                                         | All patients           |                                    |                             |            | All patients                                    |            | Matched Cohorts   |            |
|                                         | N (events)             | Restricted Mean LRFS (mo) (95% CI) | Five-year LRFS (%) (95% CI) | Log-Rank P | TR (95% CI)                                     | P Value    | TR (95% CI)       | P Value    |
| N (events)                              |                        |                                    |                             |            | 1516 (41)                                       |            | 1176 (31)         |            |
| Age (per year)                          |                        |                                    |                             |            | 1.02 (0.99-1.05)                                | .29        | 1.03 (1.01-1.05)  | .01        |
| CTC status and RT                       |                        |                                    |                             |            |                                                 |            |                   |            |
| <b>CTC x RT Interaction Coefficient</b> |                        |                                    |                             |            |                                                 | <b>.13</b> |                   | <b>.20</b> |
| CTC+ RT-                                | 46 (4)                 | 82.8 (74.1-91.5)                   | 85.7 (73.6-99.8)            |            | 1 [Reference]                                   |            | 1 [Reference]     |            |
| CTC+ RT+                                | 248 (7)                | 90.3 (88.8-91.8)                   | 98.2 (96.4-100.0)           | .003       | 3.59 (1.45-8.94)                                | .005       | 4.35 (2.60-7.28)  | <.001      |
| CTC- RT-                                | 216 (7)                | 89.8 (88.0-91.6)                   | 96.2 (93.3-99.2)            |            | 2.65 (1.11-6.36)                                | .03        | 2.12 (1.21-3.72)  | .008       |
| CTC- RT+                                | 1006 (23)              | 90.1 (89.2-91.1)                   | 98.1 (97.3-99.0)            |            | 4.31 (1.88-9.86)                                | <.001      | 5.99 (3.36-10.70) | <.001      |
| Grade                                   |                        |                                    |                             |            |                                                 |            |                   |            |
| 1/2                                     | 763 (49)               | 86.5 (84.8-88.1)                   | 95.3 (93.7-97.0)            | <.001      | 1 [Reference]                                   |            | 1 [Reference]     |            |
| 3                                       | 753 (32)               | 88.2 (86.9-89.6)                   | 96.2 (94.7-97.6)            |            | 0.33 (0.18-0.61)                                | <.001      | 0.32 (0.21-0.48)  | <.001      |
| Tumor stage                             |                        |                                    |                             |            |                                                 |            |                   |            |
| 1                                       | 709 (17)               | 90.4 (89.4-91.5)                   | 98.4 (97.4-99.4)            | .47        | 1 [Reference]                                   |            | 1 [Reference]     |            |
| 2                                       | 807 (24)               | 89.8 (88.7-90.9)                   | 97.0 (95.8-98.3)            |            | 0.74 (0.48-1.15)                                | .18        | 1.10 (0.78-1.54)  | .60        |
| Nodal stage                             |                        |                                    |                             |            |                                                 |            |                   |            |
| 0                                       | 638 (17)               | 89.3 (87.9-90.6)                   | 97.8 (96.6-99.0)            | .90        | 1 [Reference]                                   |            | 1 [Reference]     |            |
| 1*                                      | 878 (24)               | 89.7 (88.8-90.6)                   | 97.5 (96.5-98.6)            |            | 0.65 (0.41-1.03)                                | .07        | 0.56 (0.40-0.79)  | <.001      |
| Histology                               |                        |                                    |                             |            |                                                 |            |                   |            |
| IDC                                     | 1266 (35)              | 90.0 (89.2-90.9)                   | 87.6 (96.7-98.5)            | .95        | 1 [Reference]                                   |            | 1 [Reference]     |            |
| ILC                                     | 140 (3)                | 88.4 (83.1-93.7)                   | 98.2 (95.9-100.0)           |            | 0.88 (0.39-2.01)                                | .76        | 1.52 (0.77-3.01)  | .23        |
| Other                                   | 110 (3)                | 90.3 (87.9-92.7)                   | 97.0 (93.8-100.0)           |            | 1.05 (0.48-2.34)                                | .90        | 1.46 (0.75-2.86)  | .26        |
| ER status                               |                        |                                    |                             |            |                                                 |            |                   |            |
| Positive                                | 1015 (23)              | 90.6 (89.7-91.4)                   | 98.0 (97.1-99.0)            | .13        | 1 [Reference]                                   |            | 1 [Reference]     |            |
| Negative                                | 501 (18)               | 89.0 (87.3-90.7)                   | 96.9 (95.3-98.5)            |            | 0.76 (0.37-1.56)                                | .46        | 0.46 (0.24-0.87)  | .02        |
| PR status                               |                        |                                    |                             |            |                                                 |            |                   |            |
| Positive                                | 963 (23)               | 90.4 (89.6-91.2)                   | 97.9 (97.0-98.9)            | .38        | 1 [Reference]                                   |            | 1 [Reference]     |            |
| Negative                                | 553 (18)               | 89.1 (87.6-90.6)                   | 97.2 (95.8-98.7)            |            | 1.01 (0.52-1.97)                                | .97        | 1.40 (0.84-2.35)  | .19        |
| <i>ERBB2</i>                            |                        |                                    |                             |            |                                                 |            |                   |            |
| Negative                                | 438 (13)               | 88.4 (86.3-90.4)                   | 97.3 (95.6-99.0)            | .32        | 1 [Reference]                                   |            | 1 [Reference]     |            |
| Positive                                | 1078 (28)              | 90.0 (89.3-90.8)                   | 97.8 (96.9-98.7)            |            | 1.52 (0.86-2.66)                                | .15        | 1.43 (1.00-2.05)  | .05        |
| Hormone therapy                         |                        |                                    |                             |            |                                                 |            |                   |            |
| No                                      | 438 (13)               | 88.4 (86.3-90.4)                   | 97.3 (95.6-99.0)            | .32        | 1 [Reference]                                   |            | 1 [Reference]     |            |
| Yes                                     | 1078 (28)              | 90.0 (89.3-90.8)                   | 97.8 (96.9-98.7)            |            | 0.86 (0.43-1.70)                                | .67        | 0.91 (0.54-1.55)  | .74        |

|                   | All patients |                                    |                             | All patients |                  | Matched Cohorts |                  |         |
|-------------------|--------------|------------------------------------|-----------------------------|--------------|------------------|-----------------|------------------|---------|
|                   | N (events)   | Restricted Mean LRFS (mo) (95% CI) | Five-year LRFS (%) (95% CI) | Log-Rank P   | TR (95% CI)      | P Value         | TR (95% CI)      | P Value |
| Menopausal Status |              |                                    |                             |              |                  |                 |                  |         |
| Pre-menopausal    | 676 (22)     | 89.1 (87.8-90.4)                   | 97.7 (96.5-98.9)            | .34          | 1 [Reference]    |                 | 1 [Reference]    |         |
| Post-menopausal   | 840 (19)     | 90.0 (89.1-90.9)                   | 97.7 (96.6-98.8)            |              | 1.01 (0.52-1.99) | .97             | 1.16 (0.71-1.89) | .54     |

Significance determined by Log-Rank test or Wald test. LRFS (mo): Local recurrence-free survival (months); TR (95% CI): Time ratio (95% confidence interval); P: P-value; CTC: Circulating tumor cell. RT: Radiotherapy; ER: Estrogen Receptor; PR: Progesterone Receptor; *ERBB2*: Human epidermal receptor growth factor 2. \*includes N1mi (microscopic) and N1. †Association of CTC-status and radiotherapy have been adjusted for type of chemotherapy regimen, but survival estimates associated with chemotherapy have not been listed as the primary trial outcomes of the SUCCESS trial have yet to be published.

**eTable 8. Kaplan-Meier Estimates and Multivariable Survival Models for Overall Survival From the SUCCESS Cohort**

| Variable †                              | Kaplan Meier Estimates |                                  |                           |            | Accelerated Failure Time Multivariable Analysis |            |                  |            |
|-----------------------------------------|------------------------|----------------------------------|---------------------------|------------|-------------------------------------------------|------------|------------------|------------|
|                                         | All patients           |                                  |                           |            | All patients                                    |            | Matched Cohorts  |            |
|                                         | N (events)             | Restricted Mean OS (mo) (95% CI) | Five-year OS (%) (95% CI) | Log-Rank P | TR (95% CI)                                     | P Value    | TR (95% CI)      | P Value    |
| N (events)                              |                        |                                  |                           |            | 1,516 (77)                                      |            | 1,176 (67)       |            |
| Age (per year)                          |                        |                                  |                           |            | 0.99 (0.97-1.01)                                | .37        | 0.99 (0.97-1.00) | .15        |
| CTC status and RT                       |                        |                                  |                           |            |                                                 |            |                  |            |
| <b>CTC x RT Interaction Coefficient</b> |                        |                                  |                           |            |                                                 | <b>.16</b> |                  | <b>.23</b> |
| CTC+ RT-                                | 46 (5)                 | 81.5 (73.2-89.9)                 | 84.5 (72.7-98.2)          |            | 1 [Reference]                                   |            | 1 [Reference]    |            |
| CTC+ RT+                                | 248 (20)               | 86.8 (84.8-88.9)                 | 92.4 (88.9-95.9)          | .008       | 2.73 (1.16-6.41)                                | .02        | 2.05 (1.41-2.97) | <.001      |
| CTC- RT-                                | 216 (11)               | 87.4 (84.9-89.9)                 | 95.2 (92.0-98.5)          |            | 2.92 (1.22-6.99)                                | .02        | 1.99 (1.21-3.30) | .007       |
| CTC- RT+                                | 1006 (41)              | 88.9 (88.0-89.8)                 | 96.7 (95.6-97.9)          |            | 4.04 (1.80-9.08)                                | <.001      | 2.89 (1.96-4.25) | <.001      |
| Grade                                   |                        |                                  |                           |            |                                                 |            |                  |            |
| 1                                       | 77 (3)                 | 89.6 (86.9-92.3)                 | 96.9 (92.8-100.0)         | <.001      | 1 [Reference]                                   |            | 1 [Reference]    |            |
| 2                                       | 686 (17)               | 90.4 (89.7-91.1)                 | 98.0 (96.9-99.1)          |            | 1.35 (0.60-3.03)                                | .46        | 1.55 (0.87-2.75) | .14        |
| 3                                       | 753 (17)               | 86.4 (84.9-87.8)                 | 93.1 (91.2-95.0)          |            | 0.58 (0.26-1.30)                                | .19        | 0.88 (0.49-1.56) | .65        |
| Tumor stage                             |                        |                                  |                           |            |                                                 |            |                  |            |
| 1                                       | 709 (23)               | 90.0 (89.2-90.9)                 | 97.3 (96.0-98.6)          | .002       | 1 [Reference]                                   |            | 1 [Reference]    |            |
| 2                                       | 807 (54)               | 87.4 (86.1-88.7)                 | 93.9 (92.2-95.7)          |            | 0.63 (0.46-0.87)                                | .005       | 0.74 (0.58-0.93) | .01        |
| Nodal stage                             |                        |                                  |                           |            |                                                 |            |                  |            |
| 0                                       | 638 (24)               | 89.3 (88.2-90.3)                 | 96.4 (84.9-98.0)          | .06        | 1 [Reference]                                   |            | 1 [Reference]    |            |
| 1*                                      | 878 (53)               | 87.7 (86.5-88.8)                 | 94.9 (93.3-96.4)          |            | 0.52 (0.36-0.74)                                | <.001      | 0.40 (0.31-0.53) | <.001      |
| Histology                               |                        |                                  |                           |            |                                                 |            |                  |            |
| IDC                                     | 1265 (67)              | 87.9 (87.0-88.7)                 | 95.1 (93.9-96.4)          | .62        | 1 [Reference]                                   |            | 1 [Reference]    |            |
| ILC                                     | 140 (6)                | 88.4 (86.0-90.9)                 | 97.5 (94.8-100.0)         |            | 0.80 (0.46-1.38)                                | .42        | 0.80 (0.58-1.12) | .19        |
| Other                                   | 111 (4)                | 88.5 (85.8-91.2)                 | 97.0 (93.7-100.0)         |            | 1.41 (0.73-2.74)                                | .31        | 1.70 (1.04-2.78) | .04        |
| ER status                               |                        |                                  |                           |            |                                                 |            |                  |            |
| Positive                                | 1015 (35)              | 89.5 (88.6-90.3)                 | 97.2 (96.1-98.3)          | <.001      | 1 [Reference]                                   |            | 1 [Reference]    |            |
| Negative                                | 501 (42)               | 86.1 (84.4-87.8)                 | 92.2 (89.7-94.7)          |            | 0.73 (0.40-1.32)                                | .29        | 0.99 (0.59-1.67) | .96        |
| PR status                               |                        |                                  |                           |            |                                                 |            |                  |            |
| Positive                                | 963 (36)               | 89.6 (88.6-90.5)                 | 96.7 (95.5-98.0)          | .002       | 1 [Reference]                                   |            | 1 [Reference]    |            |
| Negative                                | 553 (41)               | 87.0 (85.4-88.6)                 | 93.4 (91.2-95.6)          |            | 1.23 (0.72-2.12)                                | .45        | 1.82 (1.16-2.83) | .008       |
| ERBB2 status                            |                        |                                  |                           |            |                                                 |            |                  |            |
| Negative                                | 1151 (62)              | 88.5 (87.5-89.4)                 | 95.2 (93.9-96.5)          | .42        | 1 [Reference]                                   |            | 1 [Reference]    |            |
| Positive                                | 365 (15)               | 89.2 (87.7-90.7)                 | 96.5 (94.5-98.5)          |            | 1.56 (1.05-2.32)                                | .03        | 1.27 (0.99-1.62) | .06        |
| Hormone therapy                         |                        |                                  |                           |            |                                                 |            |                  |            |
| No                                      | 438 (59)               | 79.5 (76.8-82.3)                 | 86.1 (82.6-89.8)          | <.001      | 1 [Reference]                                   |            | 1 [Reference]    |            |
| Yes                                     | 1078 (94)              | 85.3 (83.9-86.6)                 | 92.4 (90.7-94.1)          |            | 2.13 (1.28-3.53)                                | .004       | 4.11 (2.69-6.28) | <.001      |
| Menopausal Status                       |                        |                                  |                           | .04        |                                                 |            |                  |            |



| Variable †      | Kaplan Meier Estimates |                                  |                           |            | Accelerated Failure Time Multivariable Analysis |         |                  |         |
|-----------------|------------------------|----------------------------------|---------------------------|------------|-------------------------------------------------|---------|------------------|---------|
|                 | All patients           |                                  |                           |            | All patients                                    |         | Matched Cohorts  |         |
|                 | N (events)             | Restricted Mean OS (mo) (95% CI) | Five-year OS (%) (95% CI) | Log-Rank P | TR (95% CI)                                     | P Value | TR (95% CI)      | P Value |
| Pre-menopausal  | 676 (26)               | 89.6 (88.5-90.7)                 | 97.1 (95.8-98.5)          |            | 1 [Reference]                                   |         | 1 [Reference]    |         |
| Post-menopausal | 844 (51)               | 87.9 (86.7-89.1)                 | 94.1 (92.5-95.9)          |            | 1.05 (0.64-1.71)                                | .85     | 1.03 (0.73-1.45) | .88     |

Significance determined by Log-Rank test or Wald test. OS (mo): Overall survival (months); TR (95% CI): Time ratio (95% confidence interval); P: P-value; N: Number of patients; CTC: Circulating tumor cell. RT: Radiotherapy; ER: Estrogen Receptor; PR: Progesterone Receptor; *ERBB2*: Human epidermal receptor growth factor 2 Receptor. \*includes N1mi (microscopic) and N1. †Association of CTC-status and radiotherapy have been adjusted for type of chemotherapy regimen, but survival estimates associated with chemotherapy have not been listed as the primary trial outcomes of the SUCCESS trial have yet to be published.

**eTable 9. Kaplan-Meier Estimates and Multivariable Survival Models for Overall Survival of Patients Who Underwent Breast-Conserving Surgery From the Pooled Cohort**

| Variable                                | Kaplan Meier Estimates |                                  |                           |            | Accelerated Failure Time Multivariable Analysis |             |                  |                 |
|-----------------------------------------|------------------------|----------------------------------|---------------------------|------------|-------------------------------------------------|-------------|------------------|-----------------|
|                                         | All patients           |                                  |                           |            | All patients                                    |             | Matched Cohorts  |                 |
|                                         | N (events)             | Restricted Mean OS (mo) (95% CI) | Five-year OS (%) (95% CI) | Log-Rank P | TR (95% CI)                                     | P Value     | TR (95% CI)      | P Value         |
| N (events)                              |                        |                                  |                           |            | 2,175 (101)                                     |             | 1,840 (87)       |                 |
| Age (per year)                          |                        |                                  |                           |            | 0.97 (0.95-0.98)                                | <.001       | 0.96 (0.95-0.97) | <.001           |
| CTC status and RT                       |                        |                                  |                           |            |                                                 |             |                  |                 |
| <b>CTC x RT Interaction Coefficient</b> |                        |                                  |                           |            |                                                 | <b>.004</b> |                  | <b>&lt;.001</b> |
| CTC+ RT-                                | 49 (9)                 | 73.6 (63.7-83.5)                 | 73.3 (59.4-90.3)          |            | 1 [Reference]                                   |             | 1 [Reference]    |                 |
| CTC+ RT+                                | 411                    | 87.2 (85.6-88.8)                 | 93.6 (90.8-96.6)          | <.001      | 3.42 (1.47-8.00)                                | .004        | 3.42 (2.17-5.40) | <.001           |
| CTC- RT-                                | 163 (8)                | 86.0 (82.7-89.3)                 | 92.7 (87.3-98.3)          |            | 3.10 (1.33-7.24)                                | .009        | 2.82 (1.65-4.81) | <.001           |
| CTC- RT+                                | 1554                   | 87.8 (87.0-88.6)                 | 95.5 (94.3-96.6)          |            | 3.70 (1.69-8.09)                                | .001        | 3.41 (2.21-5.28) | <.001           |
| Grade                                   |                        |                                  |                           |            |                                                 |             |                  |                 |
| 1                                       | 324 (15)               | 87.9 (85.9-89.9)                 | 92.3 (88.4-96.4)          |            | 1 [Reference]                                   |             | 1 [Reference]    |                 |
| 2                                       | 1018 (30)              | 89.7 (88.8-90.5)                 | 96.4 (95.1-97.8)          | .003       | 1.41 (0.88-2.25)                                | .15         | 1.76 (1.07-2.90) | .03             |
| 3                                       | 834 (56)               | 86.9 (85.6-88.2)                 | 92.9 (91.0-94.9)          |            | 0.69 (0.41-1.16)                                | .16         | 0.73 (0.50-1.06) | .09             |
| Tumor stage                             |                        |                                  |                           |            |                                                 |             |                  |                 |
| 1                                       | 1406 (56)              | 98.2 (97.1-99.3)                 | 95.1 (93.8-96.5)          | .27        | 1 [Reference]                                   |             | 1 [Reference]    |                 |
| 2                                       | 771 (45)               | 97.0 (95.4-98.6)                 | 93.7 (91.8-95.6)          |            | 0.82 (0.60-1.13)                                | .22         | 0.96 (0.49-1.86) | .89             |
| Nodal stage                             |                        |                                  |                           |            |                                                 |             |                  |                 |
| 0                                       | 1493 (67)              | 97.5 (96.2-98.9)                 | 94.0 (92.5-95.5)          | .44        | 1 [Reference]                                   |             | 1 [Reference]    |                 |
| 1*                                      | 684 (34)               | 98.5 (97.1-99.8)                 | 95.3 (93.6-97.0)          |            | 0.77 (0.53-1.11)                                | .16         | 0.52 (0.26-1.02) | .06             |
| Histology                               |                        |                                  |                           |            |                                                 |             |                  |                 |
| IDC                                     | 1800 (86)              | 97.8 (96.7-98.8)                 | 94.5 (93.3-95.7)          | .54        | 1 [Reference]                                   |             | 1 [Reference]    |                 |
| ILC/Mixed                               | 376 (15)               | 98.9 (97.1-100.7)                | 94.5 (91.7-97.3)          |            | 1.12 (0.74-1.69)                                | .59         | 1.10 (0.28-4.37) | .89             |
| ER status                               |                        |                                  |                           |            |                                                 |             |                  |                 |
| Positive                                | 1623 (63)              | 98.3 (97.4-99.3)                 | 95.2 (93.9-96.4)          | .02        | 1 [Reference]                                   |             | 1 [Reference]    |                 |
| Negative                                | 554 (38)               | 95.9 (93.7-98.0)                 | 92.8 (90.5-95.2)          |            | 0.66 (0.37-1.20)                                | .18         | 0.71 (0.16-3.17) | .65             |
| PR status                               |                        |                                  |                           |            |                                                 |             |                  |                 |
| Positive                                | 1483 (62)              | 98.1 (97.1-99.1)                 | 94.7 (93.3-96.1)          | .27        | 1 [Reference]                                   |             | 1 [Reference]    |                 |
| Negative                                | 694 (39)               | 96.8 (94.9-98.6)                 | 94.1 (92.2-96.1)          |            | 1.56 (0.92-2.64)                                | .10         | 1.78 (0.25-1.26) | .56             |
| ERBB2 status                            |                        |                                  |                           |            |                                                 |             |                  |                 |
| Negative                                | 1825 (87)              | 97.0 (96.0-98.0)                 | 94.3 (93.1-95.6)          | .31        | 1 [Reference]                                   |             | 1 [Reference]    |                 |
| Positive                                | 352 (14)               | 98.2 (96.3-100.1)                | 95.4 (93.0-97.9)          |            | 1.37 (0.87-2.14)                                | .17         | 1.15 (0.76-1.74) | .50             |
| Chemotherapy                            |                        |                                  |                           |            |                                                 |             |                  |                 |
| No                                      | 742 (37)               | 96.8 (94.9-98.6)                 | 91.4 (88.5-94.4)          | .005       | 1 [Reference]                                   |             | 1 [Reference]    |                 |
| Yes                                     | 1435 (64)              | 98.6 (97.6-99.6)                 | 95.5 (94.4-96.7)          |            | 1.43 (0.90-2.26)                                | .13         | 1.10 (0.79-1.53) | .56             |

|                 | All patients |                                  |                           |            | All patients     |         | Matched Cohorts  |         |
|-----------------|--------------|----------------------------------|---------------------------|------------|------------------|---------|------------------|---------|
|                 | N (events)   | Restricted Mean OS (mo) (95% CI) | Five-year OS (%) (95% CI) | Log-Rank P | TR (95% CI)      | P Value | TR (95% CI)      | P Value |
| Hormone therapy |              |                                  |                           |            |                  |         |                  |         |
| No              | 609 (44)     | 94.7 (92.3-97.1)                 | 91.4 (88.8-94.0)          | <.001      | 1 [Reference]    |         | 1 [Reference]    |         |
| Yes             | 1568 (57)    | 98.7 (97.8-99.6)                 | 95.7 (94.5-96.9)          |            | 1.63 (1.05-2.53) | .31     | 1.64 (0.35-7.64) | .53     |

Significance determined by Log-Rank test or Wald test. OS (mo): Overall survival (months); TR (95% CI): Time ratio (95% confidence interval); P: P-value; N: Number of patients; CTC: Circulating tumor cell. RT: Radiotherapy; ER: Estrogen Receptor; PR: Progesterone Receptor; *ERBB2*: Human epidermal receptor growth factor 2 Receptor. \*includes N1mi (microscopic) and N1.

**eTable 10. Kaplan-Meier Estimates and Multivariable Survival Models for Overall Survival of Patients Who Underwent Mastectomy From the Pooled Cohort**

| Variable                                | Kaplan Meier Estimates |                                  |                           |            | Accelerated Failure Time Multivariable Analysis |            |                  |            |
|-----------------------------------------|------------------------|----------------------------------|---------------------------|------------|-------------------------------------------------|------------|------------------|------------|
|                                         | All patients           |                                  |                           |            | All patients                                    |            | Matched Cohorts  |            |
|                                         | N (events)             | Restricted Mean OS (mo) (95% CI) | Five-year OS (%) (95% CI) | Log-Rank P | TR (95% CI)                                     | P Value    | TR (95% CI)      | P Value    |
| N (events)                              |                        |                                  |                           |            | 1,036 (68)                                      |            | 932 (61)         |            |
| Age (per year)                          |                        |                                  |                           |            | 0.97 (0.96-0.98)                                | <.001      | 0.97 (0.96-0.98) | <.001      |
| CTC status and RT                       |                        |                                  |                           |            |                                                 |            |                  |            |
| <b>CTC x RT Interaction Coefficient</b> |                        |                                  |                           |            |                                                 | <b>.82</b> |                  | <b>.87</b> |
| CTC+ RT-                                |                        | 82.6 (78.7-86.5)                 | 84.3 (76.0-93.6)          |            | 1 [Reference]                                   |            | 1 [Reference]    |            |
| CTC+ RT+                                | 64 (7)                 | 82.0 (76.1-87.9)                 | 88.3 (79.9-97.6)          | .30        | 0.90 (0.51-1.58)                                | .36        | 0.96 (0.70-1.31) | .78        |
| CTC- RT-                                | 616 (37)               | 84.0 (81.8-86.2)                 | 91.0 (87.8-94.2)          |            | 1.34 (0.94-1.92)                                | .11        | 1.38 (1.14-1.68) | .001       |
| CTC- RT+                                | 187 (10)               | 85.1 (82.1-88.1)                 | 95.8 (92.6-99.2)          |            | 1.30 (0.80-2.11)                                | .30        | 1.66 (1.16-2.37) | .006       |
| Grade                                   |                        |                                  |                           |            |                                                 |            |                  |            |
| 1                                       | 173 (9)                | 82.2 (73.4-91.0)                 | 88.9 (80.7-97.9)          | .36        | 1 [Reference]                                   |            | 1 [Reference]    |            |
| 2                                       | 503 (29)               | 86.9 (84.7-89.0)                 | 92.5 (89.6-95.5)          |            | 0.91 (0.58-1.41)                                | .71        | 0.63 (.49-0.81)  | <.001      |
| 3                                       | 360 (30)               | 83.8 (80.7-86.9)                 | 89.2 (85.2-93.3)          |            | 0.74 (0.45-1.20)                                | .14        | 0.53 (0.39-0.73) | <.001      |
| Tumor stage                             |                        |                                  |                           |            |                                                 |            |                  |            |
| 1                                       | 595 (28)               | 91.1 (87.4-94.8)                 | 92.6 (89.6-95.7)          | .09        | 1 [Reference]                                   |            | 1 [Reference]    |            |
| 2                                       | 441 (40)               | 87.9 (84.4-91.4)                 | 89.2 (85.8-92.8)          |            | 0.72 (0.53-0.98)                                | .04        | 1.11 (0.86-1.45) | .40        |
| Nodal stage                             |                        |                                  |                           |            |                                                 |            |                  |            |
| 0                                       | 755 (45)               | 90.9 (88.4-93.4)                 | 89.4 (86.0-92.9)          | .35        | 1 [Reference]                                   |            | 1 [Reference]    |            |
| 1*                                      | 281 (23)               | 89.2 (85.2-93.2)                 | 93.2 (90.0-96.5)          |            | 0.70 (0.48-1.02)                                | .06        | 0.54 (0.44-0.67) | <.001      |
| Histology                               |                        |                                  |                           |            |                                                 |            |                  |            |
| IDC                                     | 815 (51)               | 88.8 (86.6-91.1)                 | 91.1 (88.5-93.7)          | .50        | 1 [Reference]                                   |            | 1 [Reference]    |            |
| ILC/Mixed                               | 221 (17)               | 81.0 (77.5-84.6)                 | 91.1 (86.3-96.2)          |            | 0.98 (0.71-1.34)                                | .88        | 0.92 (0.75-1.11) | .38        |
| ER status                               |                        |                                  |                           |            |                                                 |            |                  |            |
| Positive                                | 831 (49)               | 89.4 (85.8-93.1)                 | 91.8 (89.4-94.4)          | .14        | 1 [Reference]                                   |            | 1 [Reference]    |            |
| Negative                                | 205 (19)               | 87.6 (82.7-92.5)                 | 87.9 (82.5-93.6)          |            | 1.40 (0.85-2.31)                                | .19        | 0.76 (0.45-1.28) | .30        |
| PR status                               |                        |                                  |                           |            |                                                 |            |                  |            |
| Positive                                | 748 (41)               | 89.5 (85.4-93.6)                 | 92.1 (89.5-94.7)          | .04        | 1 [Reference]                                   |            | 1 [Reference]    |            |
| Negative                                | 288 (27)               | 86.2 (81.4-91.0)                 | 88.5 (84.0-93.2)          |            | 0.86 (0.56-1.30)                                | .47        | 1.20 (0.91-1.59) | .20        |
| ERBB2 status                            |                        |                                  |                           |            |                                                 |            |                  |            |
| Negative                                | 856 (55)               | 89.2 (86.3-92.2)                 | 90.5 (87.9-93.3)          | .87        | 1 [Reference]                                   |            | 1 [Reference]    |            |
| Positive                                | 180 (13)               | 89.0 (83.7-94.2)                 | 92.7 (88.3-97.2)          |            | 0.99 (0.68-1.42)                                | .94        | 1.35 (0.74-2.45) | .32        |
| Chemotherapy                            |                        |                                  |                           |            |                                                 |            |                  |            |
| No                                      | 438 (34)               | 79.3 (76.5-82.0)                 | 82.3 (75.4-89.8)          | <.001      | 1 [Reference]                                   |            | 1 [Reference]    |            |
| Yes                                     | 598 (34)               | 83.1 (81.7-84.6)                 | 94.1 (91.9-96.4)          |            | 1.65 (1.10-2.48)                                | .02        | 1.35 (0.88-2.08) | .17        |

|                 | All patients |                                  |                           |            | All patients     |         | Matched Cohorts  |         |
|-----------------|--------------|----------------------------------|---------------------------|------------|------------------|---------|------------------|---------|
|                 | N (events)   | Restricted Mean OS (mo) (95% CI) | Five-year OS (%) (95% CI) | Log-Rank P | TR (95% CI)      | P Value | TR (95% CI)      | P Value |
| Hormone therapy |              |                                  |                           |            |                  |         |                  |         |
| No              | 287 (36)     | 83.2 (78.2-88.3)                 | 81.1 (75.0-87.6)          | <.001      | 1 [Reference]    |         | 1 [Reference]    |         |
| Yes             | 749 (32)     | 91.2 (87.5-94.8)                 | 94.5 (92.4-96.7)          |            | 2.11 (1.44-3.09) | <.001   | 2.29 (1.77-2.97) | <.001   |

Significance determined by Log-Rank test or Wald test. OS (mo): Overall survival (months); TR (95% CI): Time ratio (95% confidence interval); P: P-value; N: Number of patients; CTC: Circulating tumor cell. RT: Radiotherapy; ER: Estrogen Receptor; PR: Progesterone Receptor; *ERBB2*: Human epidermal receptor growth factor 2 Receptor. \*includes N1mi (microscopic) and N1.

**eTable 11. Additional Characteristics of the NCDB Cohort Grouped by CTC Status**

| Variable           | CTC-negative<br>(N=1298) | CTC-positive<br>(N=399) | P Value | SMD  |
|--------------------|--------------------------|-------------------------|---------|------|
| LVI                |                          |                         |         |      |
| Negative           | 988 (76.1)               | 287 (71.9)              | .02     | 0.15 |
| Positive           | 95 (7)                   | 47 (12)                 |         |      |
| Unknown            | 215 (16.6)               | 65 (16)                 |         |      |
| Race               |                          |                         |         |      |
| White              | 998 (76.9)               | 316 (79.2)              | .37     | 0.06 |
| Black/Other        | 300 (23.1)               | 83 (20.8)               |         |      |
| Hispanic           |                          |                         |         |      |
| No                 | 1238 (95.4)              | 378 (94.7)              | .59     | 0.03 |
| Yes                | 60 (5)                   | 21 (5)                  |         |      |
| Insurance Status   |                          |                         |         |      |
| Private            | 668 (51.5)               | 195 (48.9)              | .39     | 0.05 |
| Government/None    | 630 (48.5)               | 204 (51.1)              |         |      |
| Comorbidity Score  |                          |                         |         |      |
| 0                  | 1055 (81.3)              | 346 (86.7)              | .03     | 0.16 |
| 1                  | 200 (15.4)               | 46 (12)                 |         |      |
| 2                  | 43 (3)                   | 7 (2)                   |         |      |
| Prior Cancer       |                          |                         |         |      |
| No                 | 1003 (77.3)              | 310 (77.7)              | .89     | 0.01 |
| Yes                | 295 (22.7)               | 89 (22.3)               |         |      |
| Facility Type      |                          |                         |         |      |
| Academic           | 382 (29.4)               | 133 (33.3)              | .006    | 0.22 |
| Community Center   | 120 (9.2)                | 52 (13)                 |         |      |
| Comprehensive      | 621 (47.8)               | 182 (45.6)              |         |      |
| Integrated Center  | 175 (13.5)               | 32 (8)                  |         |      |
| Income quartile    |                          |                         |         |      |
| Top                | 469 (36.1)               | 138 (34.6)              | .95     | 0.03 |
| 2nd                | 320 (24.7)               | 102 (25.6)              |         |      |
| 3rd                | 297 (22.9)               | 92 (23)                 |         |      |
| Bottom             | 212 (16.3)               | 67 (17)                 |         |      |
| Education quartile |                          |                         |         |      |
| Top                | 334 (25.7)               | 108 (27.1)              | .98     | 0.04 |
| 2nd                | 409 (31.5)               | 123 (30.8)              |         |      |
| 3rd                | 355 (27.3)               | 108 (27.1)              |         |      |
| Bottom             | 200 (15.4)               | 60 (15)                 |         |      |
| Population         |                          |                         |         |      |
| Urban              | 1148 (88.4)              | 360 (90.2)              | .36     | 0.06 |
| Nonurban           | 150 (11.6)               | 39 (10)                 |         |      |

Data are presented as count (percentage) or median (interquartile range) with significance determined by Fisher's exact test or Kruskal-Wallis test. Missing data was coded as "Unknown". P: P-value; SMD: Standardized Mean Difference; CTC: Circulating tumor cell; LVI: Lymphovascular Invasion.

**eTable 12. Adjusted Odds Ratios for Factors Associated With CTC-Positive Status of Patients From the NCDB Cohort**

| Variable             | OR (95% CI)      | P Value |
|----------------------|------------------|---------|
| Age                  | 0.98 (0.97-0.99) | .01     |
| Grade                |                  | .28     |
| 1                    | 1 [Reference]    |         |
| 2                    | 0.81 (0.61-1.06) | .01     |
| 3                    | 0.80 (0.56-1.15) | .13     |
| Histology            |                  |         |
| IDC                  | 1 [Reference]    |         |
| ILC/Mixed            | 1.34 (0.99-1.79) | .05     |
| LVI                  |                  | .12     |
| Negative             | 1 [Reference]    |         |
| Positive             | 1.49 (0.99-2.21) | .05     |
| Unknown              | 0.93 (0.67-1.27) | .64     |
| Tumor stage          |                  |         |
| 1                    | 1 [Reference]    |         |
| 2                    | 1.23 (0.93-1.63) | .14     |
| Nodal stage          |                  |         |
| 0                    | 1 [Reference]    |         |
| 1 (microscopic)      | 1.84 (1.14-2.93) | .01     |
| ER status            |                  |         |
| Positive             | 1 [Reference]    |         |
| Negative             | 0.53 (0.32-0.89) | .02     |
| PR status            |                  |         |
| Positive             | 1 [Reference]    |         |
| Negative             | 0.86 (0.59-1.24) | .42     |
| <i>ERBB2</i> status  |                  | .001    |
| Negative             | 1 [Reference]    |         |
| Positive             | 2.02 (1.38-2.92) | <.001   |
| Race                 |                  |         |
| White                | 1 [Reference]    |         |
| Black/Other          | 0.99 (0.72-1.34) | .93     |
| Hispanic Ethnicity   |                  | .39     |
| No                   | 1 [Reference]    |         |
| Yes                  | 1.02 (0.58-1.74) | .94     |
| Insurance status     |                  | .03     |
| Private              | 1 [Reference]    |         |
| Government/None      | 1.37 (1.03-1.81) |         |
| Comorbidity score    |                  | .13     |
| 0                    | 1 [Reference]    |         |
| 1                    | 0.75 (0.52-1.06) | .10     |
| 2                    | 0.58 (0.23-1.26) | .20     |
| Prior cancer         |                  |         |
| No                   | 1 [Reference]    |         |
| Yes                  | 1.04 (0.78-1.38) | .78     |
| Facility Type        |                  | .01     |
| Academic             | 1 [Reference]    |         |
| Community Center     | 1.28 (0.85-1.90) | .23     |
| Comprehensive Center | 0.85 (0.64-1.12) | .24     |
| Integrated Center    | 0.53 (0.33-0.81) | .004    |
| Educational quartile |                  | .70     |
| Top                  | 1 [Reference]    |         |
| 2 <sup>nd</sup>      | 0.89 (0.63-1.24) | .48     |
| 3 <sup>rd</sup>      | 0.84 (0.55-1.26) | .39     |
| Bottom               | 0.74 (0.45-1.21) | .24     |
| Income quartile      |                  | .54     |

| Variable        | OR (95% CI)      | P Value |
|-----------------|------------------|---------|
| Bottom          | 1 [Reference]    |         |
| 3 <sup>rd</sup> | 0.90 (0.61-1.34) | .61     |
| 2 <sup>nd</sup> | 0.84 (0.55-1.28) | .42     |
| Top             | 0.68 (0.42-1.09) | .11     |
| Region          |                  |         |
| Urban           | 1 [Reference]    |         |
| Non-urban       | 0.71 (0.47-1.05) | .09     |

Significance determined by Likelihood Ratio Test with p-values calculated using the  $\chi^2$  distribution. OR (95% CI): Odds ratio (95% confidence interval); P: P-value; IDC: Invasive ductal carcinoma; ILC: Invasive lobular carcinoma; LVI: Lymphovascular Invasion; ER: Estrogen Receptor; ER: Estrogen Receptor; *ERBB2*: Human epidermal receptor growth factor 2 Receptor.



**eTable 13. Characteristics of the Merged Cohorts Grouped by Receipt of Radiation**

| Variable          | No Radiation (N=997) | Radiation (N=2216) | P Value | SMD  |
|-------------------|----------------------|--------------------|---------|------|
| Age (year)        | 60.0 [50.0, 70.0]    | 56.0 [48.0, 65.0]  | <.001   | 0.32 |
| CTC               |                      |                    |         |      |
| CTC+              | 218 (21.9)           | 475 (21.4)         | .78     | 0.01 |
| CTC-              | 779 (78.1)           | 1741 (78.6)        |         |      |
| Tumor stage       |                      |                    |         |      |
| 1                 | 649 (65.1)           | 1352 (61.0)        | .03     | 0.09 |
| 2                 | 348 (34.9)           | 864 (39.0)         |         |      |
| Nodal stage       |                      |                    |         |      |
| 0                 | 808 (81.0)           | 1440 (65.0)        | <.001   | 0.37 |
| 1*                | 189 (19.0)           | 776 (35.0)         |         |      |
| Grade             |                      |                    |         |      |
| 1                 | 195 (19.6)           | 302 (13.6)         | <.001   | 0.18 |
| 2                 | 475 (47.6)           | 1046 (47.2)        |         |      |
| 3                 | 327 (32.8)           | 867 (39.1)         |         |      |
| Histology         |                      |                    |         |      |
| IDC               | 792 (79.4)           | 1823 (82.3)        | .06     | 0.07 |
| ILC/Mixed         | 205 (20.6)           | 392 (17.7)         |         |      |
| ER status         |                      |                    |         |      |
| Positive          | 804 (80.6)           | 1650 (74.5)        | <.001   | 0.15 |
| Negative          | 193 (19.4)           | 566 (25.5)         |         |      |
| PR status         |                      |                    |         |      |
| Positive          | 728 (73.0)           | 1503 (67.8)        | .003    | 0.11 |
| Negative          | 269 (27.0)           | 713 (32.2)         |         |      |
| ERBB2 status      |                      |                    |         |      |
| Negative          | 849 (85.2)           | 1832 (82.7)        | .08     | 0.07 |
| Positive          | 148 (14.8)           | 384 (17.3)         |         |      |
| Surgery           |                      |                    |         |      |
| BCS               | 212 (21.3)           | 1965 (88.7)        | <.001   | 1.84 |
| Mastectomy        | 785 (78.7)           | 251 (11.3)         |         |      |
| Radiation Volumes |                      |                    |         |      |
| None              | 997 (100.0)          | 0 (0)              |         |      |
| Breast            | 0 (0)                | 2116 (95.5)        | <.001   | 4.46 |
| Breast and LN     | 0 (0)                | 65 (3)             |         |      |
| Not reported      | 0 (0)                | 35 (2)             |         |      |

Data are presented as count (percentage) or median (interquartile range), with significance determined by Fisher's exact test or Kruskal-Wallis test. P: P-value; SMD: Standardized Mean Difference; Follow-up (mo): Follow-up (months); CTC: Circulating tumor cell; IDC: Invasive ductal carcinoma; ILC: Invasive lobular carcinoma; ER: Estrogen Receptor; PR: Progesterone Receptor; ERBB2: Human epidermal receptor growth factor 2 Receptor; BCS: Breast-conserving surgery; Mast: Mastectomy. \*includes N1mi (microscopic) and N1.

**eTable 14. Characteristics of the Patients Within the Merged Cohorts Who Received Breast-Conserving Surgery or Mastectomy Grouped by Receipt of Radiation**

| Variable     | Breast-conserving surgery |                     |         |      | Mastectomy           |                   |         |      |
|--------------|---------------------------|---------------------|---------|------|----------------------|-------------------|---------|------|
|              | No Radiation (N=212)      | Radiation (N=1,965) | P Value | SMD  | No Radiation (N=785) | Radiation (N=251) | P Value | SMD  |
| Age (year)   | 65.5 [53.8, 74.3]         | 57.0 [48.0, 65.0]   | <.001   | 0.55 | 59.0 [50.0, 68.0]    | 51.0 [45.0, 60.0] | <.001   | 0.57 |
| CTC status   |                           |                     |         |      |                      |                   |         |      |
| CTC+         | 49 (23)                   | 411 (20.9)          | .48     | 0.05 | 169 (21.5)           | 64 (25.5)         | .19     | 0.09 |
| CTC-         | 163 (76.9)                | 1554 (79.1)         |         |      | 616 (78.5)           | 187 (74.5)        |         |      |
| Tumor stage  |                           |                     |         |      |                      |                   |         |      |
| 1            | 149 (70.3)                | 1257 (64.0)         | .08     | 0.14 | 500 (63.7)           | 95 (37.8)         | <.001   | 0.54 |
| 2            | 63 (30)                   | 708 (36.0)          |         |      | 285 (36.3)           | 156 (62.2)        |         |      |
| Nodal stage  |                           |                     |         |      |                      |                   |         |      |
| 0            | 169 (79.7)                | 1324 (67.4)         | <.001   | 0.28 | 639 (81.4)           | 116 (46.2)        | <.001   | 0.79 |
| 1*           | 43 (20)                   | 641 (32.6)          |         |      | 114 (14.5)           | 130 (51.8)        |         |      |
| Grade        |                           |                     |         |      |                      |                   |         |      |
| 1            | 40 (19)                   | 284 (14.5)          | .14     | 0.14 | 155 (19.7)           | 18 (7)            | <.001   | 0.38 |
| 2            | 101 (47.6)                | 917 (46.7)          |         |      | 374 (47.6)           | 129 (51.4)        |         |      |
| 3            | 71 (34)                   | 763 (38.8)          |         |      | 256 (32.6)           | 104 (41.4)        |         |      |
| Histology    |                           |                     |         |      |                      |                   |         |      |
| IDC          | 173 (81.6)                | 1627 (82.8)         | .63     | 0.03 | 619 (78.9)           | 196 (78.1)        | .79     | 0.02 |
| ILC/Mixed    | 39 (18)                   | 337 (17.2)          |         |      | 166 (21.1)           | 55 (22)           |         |      |
| ER status    |                           |                     |         |      |                      |                   |         |      |
| Positive     | 167 (78.8)                | 1456 (74.1)         | .16     | 0.11 | 637 (81.1)           | 194 (77.3)        | .20     | 0.10 |
| Negative     | 45 (21)                   | 509 (25.9)          |         |      | 148 (18.9)           | 57 (23)           |         |      |
| PR status    |                           |                     |         |      |                      |                   |         |      |
| Positive     | 156 (73.6)                | 1327 (67.5)         | .08     | 0.13 | 572 (72.9)           | 176 (70.1)        | .42     | 0.06 |
| Negative     | 56 (26)                   | 636 (32.4)          |         |      | 213 (27.1)           | 75 (30)           |         |      |
| ERBB2 status |                           |                     |         |      |                      |                   |         |      |
| Negative     | 181 (85.4)                | 1644 (83.7)         | .56     | 0.05 | 668 (85.1)           | 188 (74.9)        | <.001   | 0.26 |
| Positive     | 31 (15)                   | 321 (16.3)          |         |      | 117 (14.9)           | 63 (25)           |         |      |

Data are presented as count (percentage) or median (interquartile range), with significance determined by Fisher's exact test or Kruskal-Wallis test. P: P-value; SMD: Standardized Mean Difference; Follow-up (mo): Follow-up (months); CTC: Circulating tumor cell; IDC: Invasive ductal carcinoma; ILC: Invasive lobular carcinoma; ER: Estrogen Receptor; PR: Progesterone Receptor; ERBB2: Human epidermal receptor growth factor 2 Receptor.

\*includes N1mi (microscopic) and N1.

**eTable 15. Sensitivity Analyses for Possible Unmeasured Confounding**

| TR confounder                                                                      | Prevalence in treated | Prevalence in control | TR treated | Lower 95% CI | Upper 95% CI |
|------------------------------------------------------------------------------------|-----------------------|-----------------------|------------|--------------|--------------|
| <b>NCDB: CTC+RT+ vs, CTC+RT- (reference); Overall Survival</b>                     |                       |                       |            |              |              |
| 2.00                                                                               | 0.7                   | 0.4                   | 1.67       | 1.27         | 2.18         |
| 3.00                                                                               | 0.7                   | 0.4                   | 1.49       | 1.13         | 1.95         |
| 4.00                                                                               | 0.7                   | 0.4                   | 1.38       | 1.05         | 1.81         |
| 5.00                                                                               | 0.7                   | 0.4                   | 1.31       | 0.99         | 1.71         |
| 2.00                                                                               | 0.6                   | 0.3                   | 1.65       | 1.26         | 2.16         |
| 3.00                                                                               | 0.6                   | 0.3                   | 1.46       | 1.11         | 1.92         |
| 4.00                                                                               | 0.6                   | 0.3                   | 1.35       | 1.02         | 1.76         |
| 5.00                                                                               | 0.6                   | 0.3                   | 1.26       | 0.96         | 1.65         |
| TR confounder                                                                      | Prevalence in treated | Prevalence in control | TR treated | Lower 95% CI | Upper 95% CI |
| <b>SUCCESS: CTC+RT+ vs, CTC+RT- (reference) (reference); Disease-Free Survival</b> |                       |                       |            |              |              |
| 2.00                                                                               | 0.9                   | 0.4                   | 2.18       | 1.60         | 2.98         |
| 3.00                                                                               | 0.9                   | 0.4                   | 1.84       | 1.35         | 2.51         |
| 4.00                                                                               | 0.9                   | 0.4                   | 1.65       | 1.21         | 2.24         |
| 5.00                                                                               | 0.9                   | 0.4                   | 1.52       | 1.11         | 2.07         |
| 6.00                                                                               | 0.9                   | 0.4                   | 1.42       | 1.04         | 1.94         |
| 7.00                                                                               | 0.9                   | 0.4                   | 1.35       | 0.99         | 1.84         |
| 2.00                                                                               | 0.8                   | 0.3                   | 2.16       | 1.58         | 2.95         |
| 3.00                                                                               | 0.8                   | 0.3                   | 1.79       | 1.31         | 2.44         |
| 5.00                                                                               | 0.8                   | 0.3                   | 1.44       | 1.05         | 1.96         |
| 6.00                                                                               | 0.8                   | 0.3                   | 1.34       | 0.98         | 1.82         |

TR: Time Ratio; 95% CI: 95% confidence interval; CTC: Circulating tumor cell; RT: Radiotherapy.
